# Supplementary material for: Pseudo-octahedral nickel(ii) complexes of strongly absorbing benzannulated pincer-type amido ligands: ligand-based redox and non-Aufbau electronic behaviour
Source: Royal Society of Chemistry journal article supplement (doi:10.1039/d0ra10761a), 2021-01-01
Supplement: d0ra10761a1.pdf [file d0ra10761a1.pdf]

# SUPPORTING INFORMATION

## FOR

# Pseudo-octahedral Nickel(II) Complexes of Strongly Absorbing Benzannulated Pincer-Type Amido Ligands: Ligand-Based Redox and non- Aufbau Electronic Behaviour

Jason D. Braun,<sup>a</sup> Issiah B. Lozada,<sup>a</sup> Michael Shepit,<sup>b</sup> Johan van Lierop<sup>b</sup> and David E. Herbert<sup>a\*</sup>

<sup>a</sup>Department of Chemistry and the Manitoba Institute of Materials, University of Manitoba, 144  
Dysart Road, Winnipeg, MB, R3T 2N2, Canada

<sup>b</sup>Department of Physics and Astronomy, University of Manitoba, 31A Sifton Rd, Winnipeg,  
MB, Canada, R3T 2N2

\*david.herbert@umanitoba.ca

## Table of Contents

|                                                                                                                                                                                                                                                                                                             |    |
|-------------------------------------------------------------------------------------------------------------------------------------------------------------------------------------------------------------------------------------------------------------------------------------------------------------|----|
| <b>Figure S1.</b> $^1\text{H}$ NMR (300 MHz, $\text{CDCl}_3$ , $25^\circ\text{C}$ ) of $(^{\text{CF}_3}\text{L})_2\text{Ni}$ .                                                                                                                                                                              | 4  |
| <b>Figure S2.</b> $^1\text{H}$ NMR (300 MHz, $\text{CDCl}_3$ , $25^\circ\text{C}$ ) of $(^{\text{Cl}}\text{L})_2\text{Ni}$ .                                                                                                                                                                                | 4  |
| <b>Figure S3.</b> Evans' method NMR (300 MHz, $\text{CDCl}_3$ , $25^\circ\text{C}$ ) of $(^{\text{CF}_3}\text{L})_2\text{Ni}$ .                                                                                                                                                                             | 5  |
| <b>Figure S4.</b> Evans' method NMR (300 MHz, $\text{CDCl}_3$ , $25^\circ\text{C}$ ) of $(^{\text{Cl}}\text{L})_2\text{Ni}$ .                                                                                                                                                                               | 5  |
| <b>Figure S5.</b> $1/\chi$ plot for $(^{\text{tBu}}\text{L})_2\text{Ni}$ .                                                                                                                                                                                                                                  | 6  |
| <b>Figure S6.</b> $1/\chi$ plot for $(^{\text{CF}_3}\text{L})_2\text{Ni}$ .                                                                                                                                                                                                                                 | 7  |
| <b>Figure S7.</b> $1/\chi$ plot for $(^{\text{Cl}}\text{L})_2\text{Ni}$ .                                                                                                                                                                                                                                   | 8  |
| <b>Table S1.</b> Selected bond distances ( $\text{\AA}$ ) and angles ( $^\circ$ ) for $(^{\text{R}}\text{L})_2\text{Ni}$ complexes.                                                                                                                                                                         | 9  |
| <b>Table S2.</b> Crystal structure and optimized (SMD-O3LYP/6-31+G(d,p)) ground state geometric parameters for $(^{\text{R}}\text{L})_2\text{Ni}$ .                                                                                                                                                         | 10 |
| <b>Table S3.</b> Fragment contributions (%) to selected ground state ROKS MOs of $(^{\text{CF}_3}\text{L})_2\text{Ni}$ (Figure 6) using Hirshfeld atomic population method (SMD-roPBE0/6-31+G(d,p)//SMD-uO3LYP/6-31+G(d,p)).                                                                                | 10 |
| <b>Figure S8.</b> Ground state spin density isosurfaces (isovalue = 0.004) and Mulliken spin density on Ni for $(^{\text{CF}_3}\text{L})_2\text{Ni}$ and $(^{\text{Cl}}\text{L})_2\text{Ni}$ (SMD-uPBE0/6-31+G(d,p)//SMD-uO3LYP/6-31+G(d,p)).                                                               | 11 |
| <b>Figure S9.</b> Selected molecular orbital isosurfaces (isovalue = 0.04; SMD-uPBE0/6-31+G(d,p)//SMD-uO3LYP/6-31+G(d,p)) and electron-hole density maps (isovalue = 0.002; green = electron, blue = hole) for the lowest energy transitions in $(^{\text{CF}_3}\text{L})_2\text{Ni}$ ( $E < 3$ eV).        | 11 |
| <b>Table S4.</b> Fragment contributions ( $\alpha/\beta$ ; %) to selected ground state UKS MOs of $(^{\text{CF}_3}\text{L})_2\text{Ni}$ using Hirshfeld atomic population method (SMD-uPBE0/6-31+G(d,p)//SMD-uO3LYP/6-31+G(d,p)).                                                                           | 12 |
| <b>Figure S10.</b> Selected molecular orbital isosurfaces (isovalue = 0.04; SMD-uPBE0/6-31+G(d,p)//SMD-uO3LYP/6-31+G(d,p)) and electron-hole density maps (isovalue = 0.002; green = electron, blue = hole) for the lowest energy transitions in $(^{\text{Cl}}\text{L})_2\text{Ni}$ ( $E < 3$ eV).         | 12 |
| <b>Table S5.</b> Fragment contributions ( $\alpha/\beta$ ; %) to selected ground state UKS MOs of $(^{\text{Cl}}\text{L})_2\text{Ni}$ using Hirshfeld atomic population method (SMD-uPBE0/6-31+G(d,p)//SMD-uO3LYP/6-31+G(d,p)).                                                                             | 13 |
| <b>Figure S11.</b> TD-DFT simulated spectrum (---) and vertical excitation energies (red) superimposed on the experimental spectrum (-) of $(^{\text{CF}_3}\text{L})_2\text{Ni}$ in $\text{CH}_3\text{CN}$ (TD-SMD-uPBE0/6-31+G(d,p)//SMD-uO3LYP/6-31+G(d,p)); FWHM = $3000\text{ cm}^{-1}$ ; $f > 0.05$ ). | 13 |
| <b>Table S6.</b> TDDFT predicted vertical excitation energies, oscillator strengths ( $f_{\text{osc}} > 0.05$ ), and MO contributions ( $> 10\%$ ) $(^{\text{CF}_3}\text{L})_2\text{Ni}$ (TD-SMD-uPBE0/6-31+G(d,p)//SMD-uO3LYP/6-31+G(d,p)); FWHM = $3000\text{ cm}^{-1}$ ; $f > 0.05$ ).                   | 14 |

|                                                                                                                                                                                                                                                                                                              |           |
|--------------------------------------------------------------------------------------------------------------------------------------------------------------------------------------------------------------------------------------------------------------------------------------------------------------|-----------|
| <b>Figure S12. TD-DFT simulated spectrum (---) and vertical excitation energies (red) superimposed on the experimental spectrum (-) of <math>(^{Cl}L)_2Ni</math> in <math>CH_3CN</math> (TD-SMD-uPBE0/6-31+G(d,p)//SMD-uO3LYP/6-31+G(d,p)); FWHM = 3000 <math>cm^{-1}</math>; <math>f &gt; 0.05</math>).</b> | <b>15</b> |
| <b>Table S7. TDDFT predicted vertical excitation energies, oscillator strengths (<math>f_{osc} &gt; 0.05</math>), and MO contributions (&gt; 10%) <math>(^{Cl}L)_2Ni</math> (TD-SMD-uPBE0/6-31+G(d,p)//SMD-uO3LYP/6-31+G(d,p)).</b>                                                                          | <b>16</b> |
| <b>Equations – IVCT Marcus-Hush Analysis</b>                                                                                                                                                                                                                                                                 | <b>16</b> |
| <b>Figure S13. <math>^1H</math> NMR (300 MHz, <math>CDCl_3</math>, 25°C) of 4-nitro-2-chlorophenanthridine (1c).</b>                                                                                                                                                                                         | <b>17</b> |
| <b>Figure S14. <math>^{13}C\{^1H\}</math> NMR (75 MHz, <math>CDCl_3</math>, 25°C) of 4-nitro-2-chlorophenanthridine (1c).</b>                                                                                                                                                                                | <b>17</b> |
| <b>Figure S15. <math>^1H</math> NMR (300 MHz, <math>CDCl_3</math>, 25°C) of 4-amino-2-chlorophenanthridine (1e).</b>                                                                                                                                                                                         | <b>18</b> |
| <b>Figure S16. <math>^{13}C\{^1H\}</math> NMR (75 MHz, <math>CDCl_3</math>, 25°C) of 4-amino-2-chlorophenanthridine (1e).</b>                                                                                                                                                                                | <b>18</b> |
| <b>Figure S17. <math>^1H</math> NMR (500 MHz, <math>CDCl_3</math>, 25°C) of <math>^{Cl-Phen}NN(H)N^{Quin}</math> (L3).</b>                                                                                                                                                                                   | <b>19</b> |
| <b>Figure S18. <math>^{13}C\{^1H\}</math> NMR (125 MHz, <math>CDCl_3</math>, 25°C) of <math>^{Cl-Phen}NN(H)N^{Quin}</math> (L3).</b>                                                                                                                                                                         | <b>19</b> |
| <b>Figure S19. <math>^1H-^1H</math> COSY NMR (500/125 MHz, <math>CDCl_3</math>, 25°C) of <math>^{Cl-Phen}NN(H)N^{Quin}</math> (L3).</b>                                                                                                                                                                      | <b>20</b> |
| <b>Figure S20. HSQC NMR (500/125 MHz, <math>CDCl_3</math>, 25°C) of <math>^{Cl-Phen}NN(H)N^{Quin}</math> (L3).</b>                                                                                                                                                                                           | <b>20</b> |
| <b>Figure S21. HMBC NMR (500/125 MHz, <math>CDCl_3</math>, 25°C) of <math>^{Cl-Phen}NN(H)N^{Quin}</math> (L3).</b>                                                                                                                                                                                           | <b>21</b> |
| <b>Figure S22. HR-MS of <math>(^{CF_3}L)_2Ni</math>.</b>                                                                                                                                                                                                                                                     | <b>22</b> |
| <b>Figure S23. HR-MS of <math>(^{Cl}L)_2Ni</math>.</b>                                                                                                                                                                                                                                                       | <b>23</b> |
| <b>Energies and Reaction Coordinates</b>                                                                                                                                                                                                                                                                     | <b>24</b> |

JDB-04-170-C3H.1.fid  
PROTON\_wide CDCl3 (C:\Bruker\TOPSPIN1.3) Herbert 24

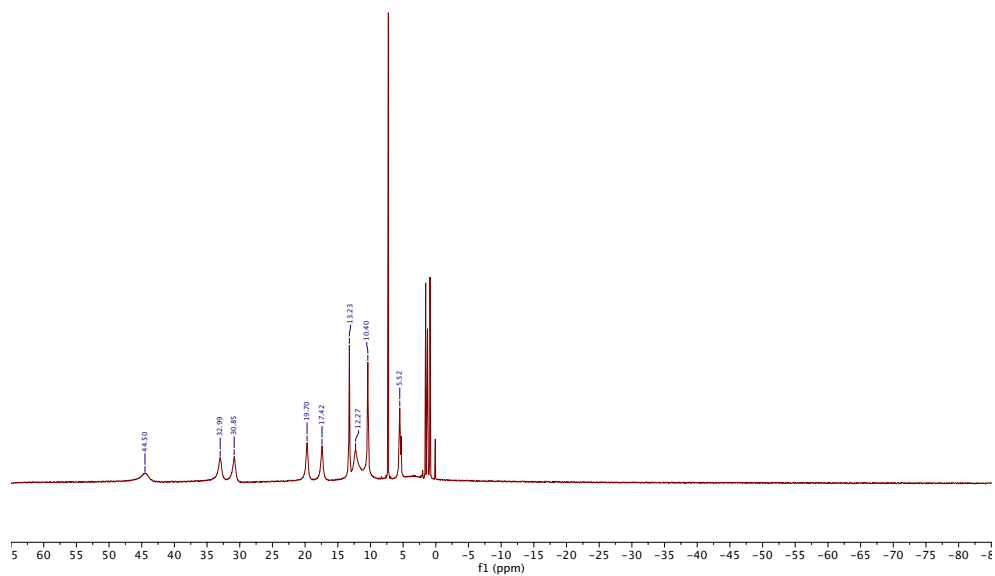

**Figure S1.** <sup>1</sup>H NMR (300 MHz, CDCl<sub>3</sub>, 25°C) of (CF<sub>3</sub>L)<sub>2</sub>Ni.

JDB-04-171-A3H.1.fid  
PROTON\_wide CDCl3 (C:\Bruker\TOPSPIN1.3) Herbert 27

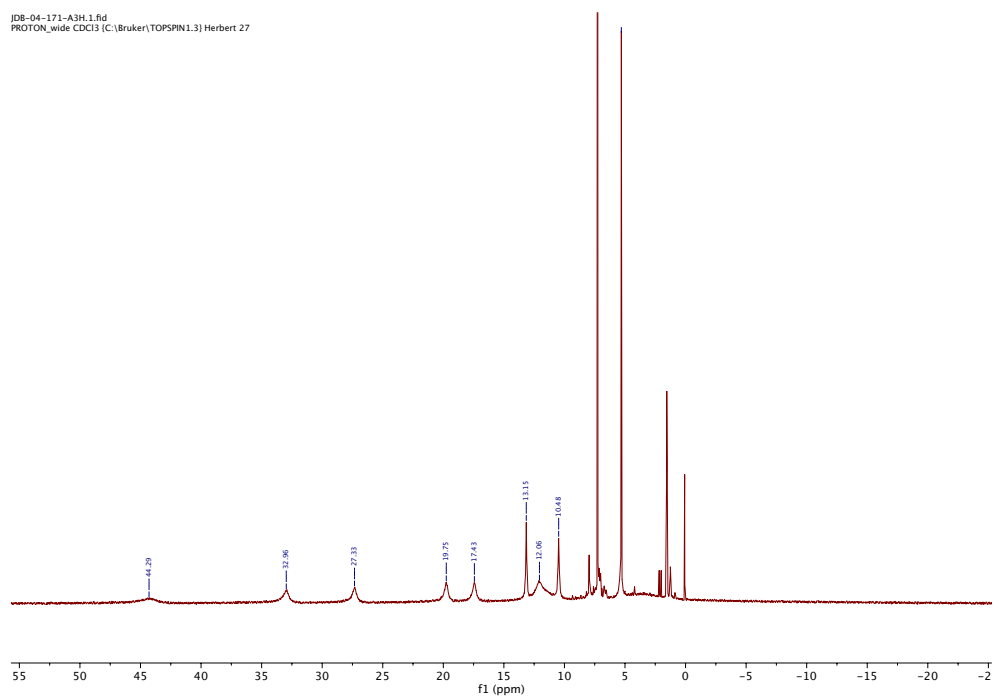

**Figure S2.** <sup>1</sup>H NMR (300 MHz, CDCl<sub>3</sub>, 25°C) of (ClL)<sub>2</sub>Ni.

JDB-04-170-E3H.1.fid  
Evans method  
PROTON CDCl3 [C:\Bruker\TOPSPIN1.3] Herbert 24

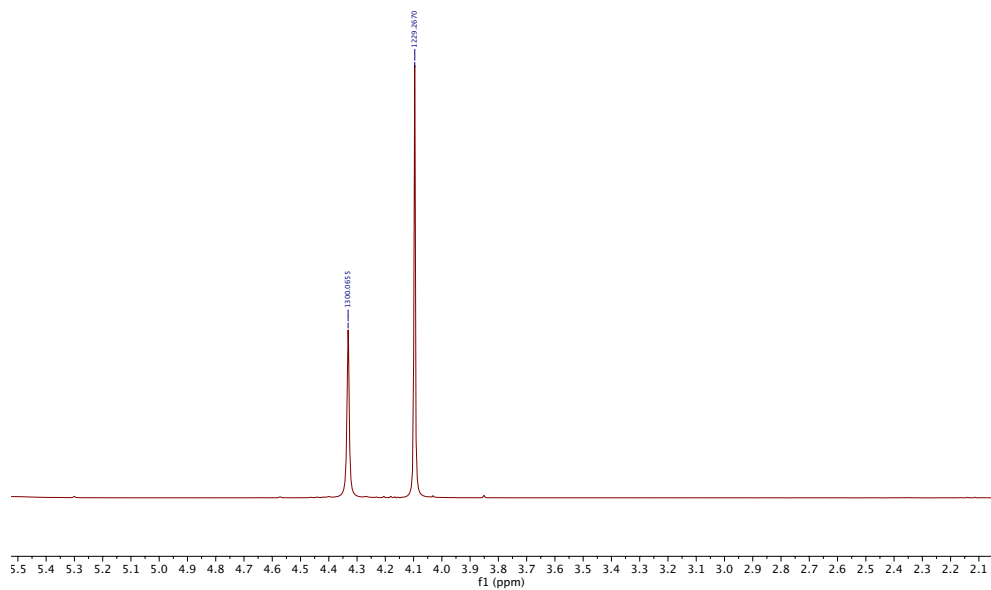

**Figure S3.** Evans' method NMR (300 MHz, CDCl<sub>3</sub>, 25°C) of (CF<sub>3</sub>L)<sub>2</sub>Ni.

JDB-04-171-D3H.1.fid  
Evans method  
PROTON CDCl3 [C:\Bruker\TOPSPIN1.3] Herbert 49

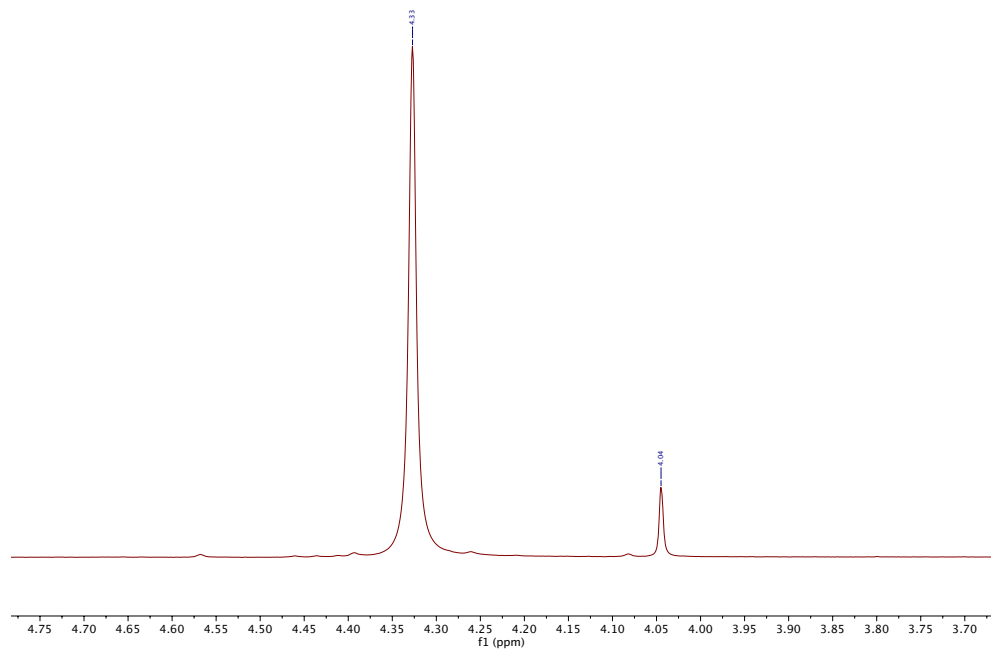

**Figure S4.** Evans' method NMR (300 MHz, CDCl<sub>3</sub>, 25°C) of (ClL)<sub>2</sub>Ni.

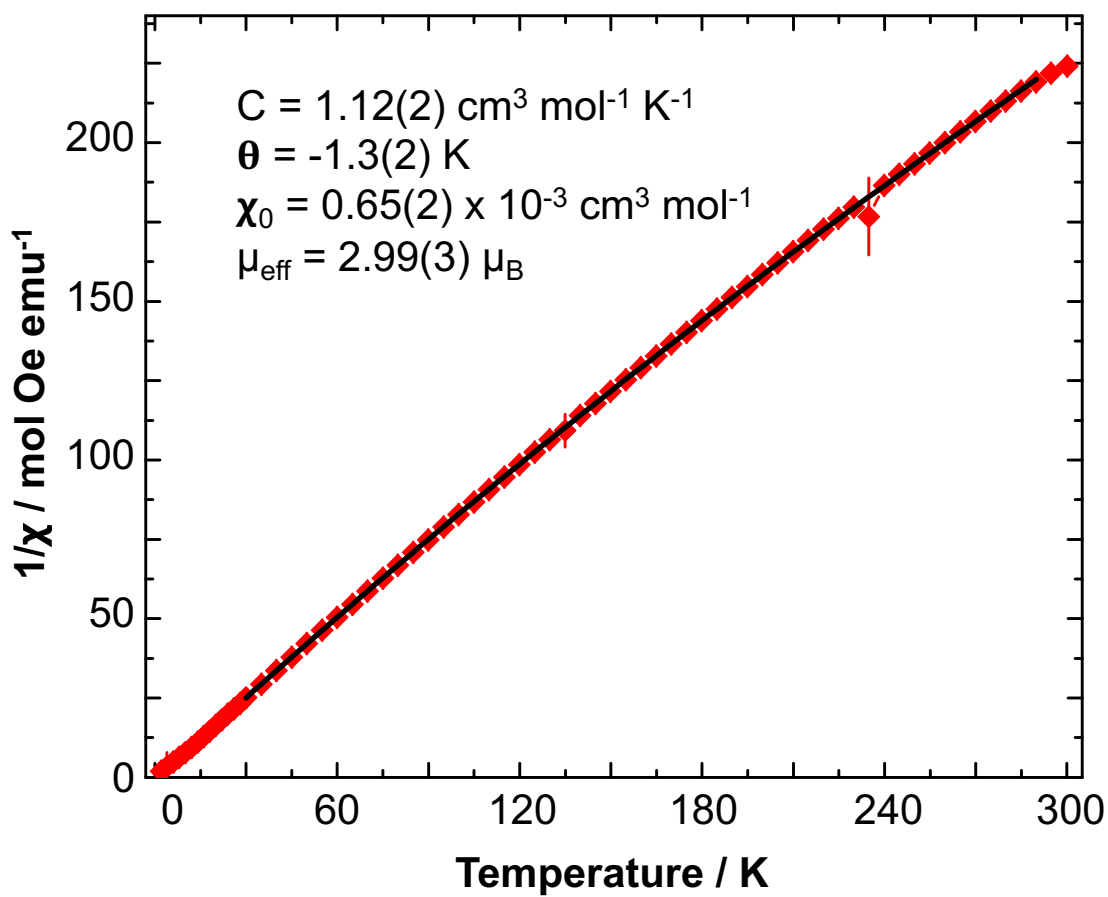

Figure S5.  $1/\chi$  plot for  $(t\text{BuL})_2\text{Ni}$ .

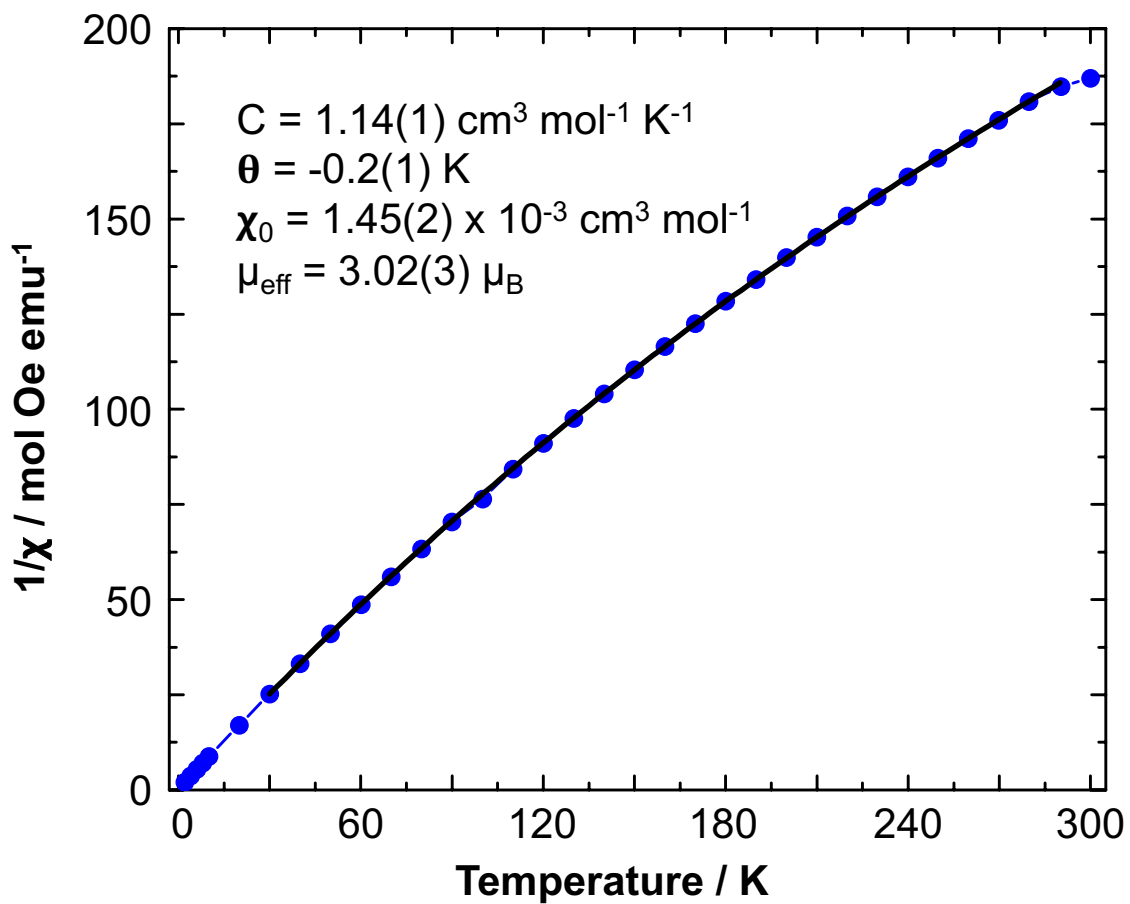

Figure S6.  $1/\chi$  plot for  $(\text{CF}_3\text{L})_2\text{Ni}$ .

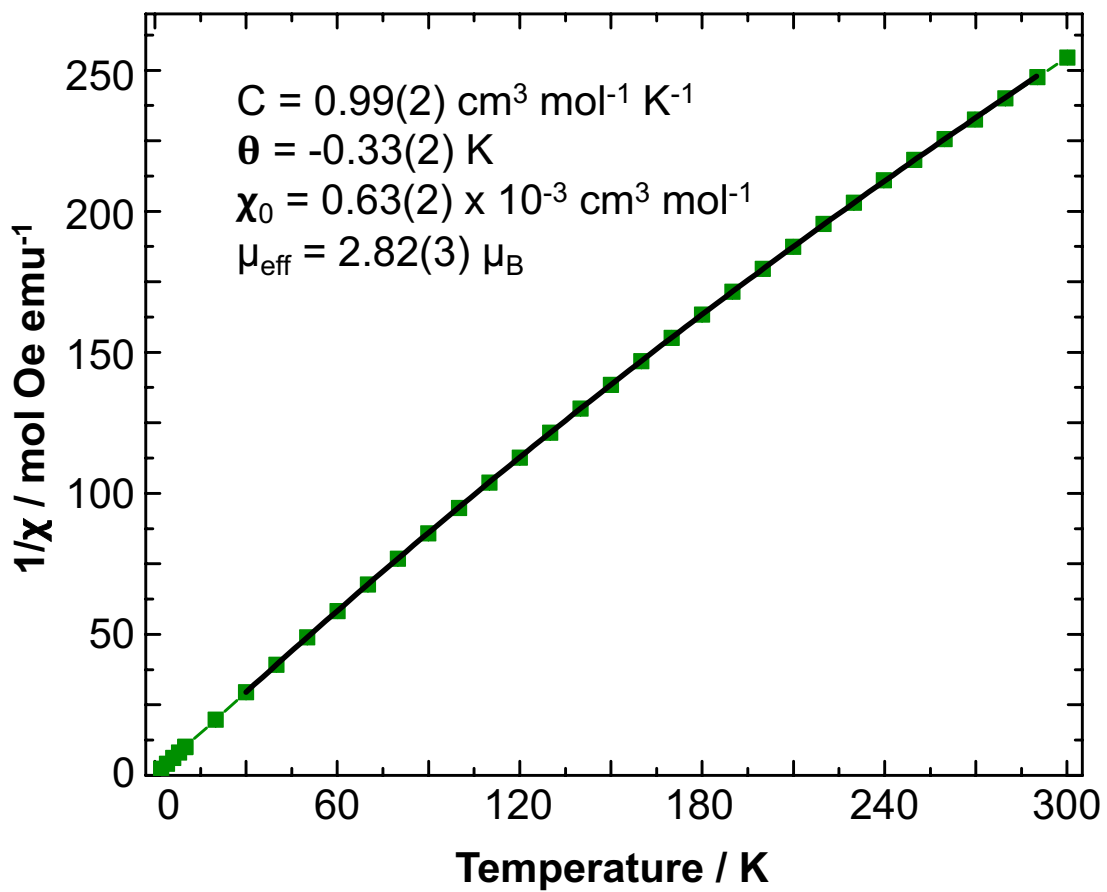

Figure S7.  $1/\chi$  plot for  $(\text{Cl})_2\text{Ni}$ .



**Table S1.** Selected bond distances (Å) and angles (°) for (**<sup>R</sup>L**)<sub>2</sub>Ni complexes.

|                                                | ( <sup>t</sup> Bu <b>L</b> ) <sub>2</sub> Ni | ( <sup>CF3</sup> <b>L</b> ) <sub>2</sub> Ni | ( <sup>Cl</sup> <b>L</b> ) <sub>2</sub> Ni |
|------------------------------------------------|----------------------------------------------|---------------------------------------------|--------------------------------------------|
| <b><i>Ni – N<sub>phen</sub></i></b>            |                                              |                                             |                                            |
| Ni – N1                                        | 2.0707(13)                                   | 2.0830(19)                                  | 2.088(3)                                   |
| Ni – N4                                        | 2.0789(13)                                   | 2.0728(19)                                  | 2.066(3)                                   |
| <b><i>Ni – N<sub>amido</sub></i></b>           |                                              |                                             |                                            |
| Ni – N2                                        | 2.0168(13)                                   | 2.0163(18)                                  | 2.000(3)                                   |
| Ni – N5                                        | 2.0161(13)                                   | 2.0142(18)                                  | 2.014(3)                                   |
| <b><i>Ni – N<sub>quin</sub></i></b>            |                                              |                                             |                                            |
| Ni – N3                                        | 2.0766(14)                                   | 2.0797(19)                                  | 2.091(4)                                   |
| Ni – N6                                        | 2.0721(13)                                   | 2.0790(19)                                  | 2.060(3)                                   |
| <b><i>N<sub>phen</sub> – C<sup>a</sup></i></b> |                                              |                                             |                                            |
| N1 – C1                                        | 1.310(2)                                     | 1.302(3)                                    | 1.289(5)                                   |
| N4 – C27                                       | 1.3047(19)                                   | 1.302(3)                                    | 1.300(4)                                   |
| N4 – C24                                       |                                              |                                             |                                            |
| N4 – C23                                       |                                              |                                             |                                            |
| <b><i>Intraligand angles</i></b>               |                                              |                                             |                                            |
| N1 – Ni – N3                                   | 159.75(5)                                    | 159.28(7)                                   | 159.41(14)                                 |
| N1 – Ni – N2                                   | 80.09(5)                                     | 79.38(7)                                    | 79.81(14)                                  |
| N2 – Ni – N3                                   | 79.72(5)                                     | 79.91(8)                                    | 79.68(17)                                  |
| N4 – Ni – N6                                   | 160.26(5)                                    | 159.69(7)                                   | 160.52(11)                                 |
| N4 – Ni – N5                                   | 80.00(5)                                     | 79.78(7)                                    | 80.18(11)                                  |
| N5 – Ni – N6                                   | 80.28(5)                                     | 79.98(7)                                    | 80.51(11)                                  |
| <b><i>Interligand angles</i></b>               |                                              |                                             |                                            |
| N2 – Ni – N5                                   | 178.25(5)                                    | 177.04(7)                                   | 178.83(13)                                 |
| N1 – Ni – N6                                   | 91.84(5)                                     | 92.18(7)                                    | 91.50(12)                                  |
| N2 – Ni – N4                                   | 98.36(5)                                     | 102.75(8)                                   | 98.71(12)                                  |
| N2 – Ni – N6                                   | 101.37(5)                                    | 97.53(8)                                    | 100.61(13)                                 |
| N1 – Ni – N5                                   | 100.51(5)                                    | 99.04(7)                                    | 100.54(11)                                 |
| N3 – Ni – N5                                   | 99.72(5)                                     | 101.67(8)                                   | 99.94(14)                                  |
| N3 – Ni – N4                                   | 93.42(5)                                     | 91.40(8)                                    | 91.81(11)                                  |

<sup>a</sup> “Imine-like” (C=N) carbon adjacent to N(1) and N(4) in the phenanthridine arm, labeled C27 in (<sup>t</sup>Bu**L**)<sub>2</sub>Ni, C24 in (<sup>CF3</sup>**L**)<sub>2</sub>Ni and C23 in (<sup>Cl</sup>**L**)<sub>2</sub>Ni

**Table S2.** Crystal structure and optimized (SMD-O3LYP/6-31+G(d,p)) ground state geometric parameters for (<sup>R</sup>L)<sub>2</sub>Ni.

|                                                | <i>(t</i> BuL) <sub>2</sub> Ni |            | <i>(CF</i> <sup>3</sup> L) <sub>2</sub> Ni |            | <i>(Cl</i> L) <sub>2</sub> Ni |            |
|------------------------------------------------|--------------------------------|------------|--------------------------------------------|------------|-------------------------------|------------|
| <b>Bond / Å</b>                                | <b>XRD</b>                     | <b>DFT</b> | <b>XRD</b>                                 | <b>DFT</b> | <b>XRD</b>                    | <b>DFT</b> |
| Ni-N <sub>amide,1</sub>                        | 2.017                          | 2.043      | 2.016                                      | 2.038      | 2.000                         | 2.042      |
| Ni-N <sub>amide,2</sub>                        | 2.016                          | 2.043      | 2.014                                      | 2.038      | 2.014                         | 2.042      |
| Ni-N <sub>phen,1</sub>                         | 2.071                          | 2.130      | 2.083                                      | 2.137      | 2.088                         | 2.132      |
| Ni-N <sub>phen,2</sub>                         | 2.078                          | 2.131      | 2.073                                      | 2.137      | 2.066                         | 2.132      |
| Ni-N <sub>quin,1</sub>                         | 2.076                          | 2.135      | 2.080                                      | 2.135      | 2.091                         | 2.133      |
| Ni-N <sub>quin,2</sub>                         | 2.072                          | 2.134      | 2.079                                      | 2.135      | 2.060                         | 2.129      |
| <b>Angle / °</b>                               |                                |            |                                            |            |                               |            |
| N <sub>amide,1</sub> - Ni-N <sub>amide,2</sub> | 178.2                          | 179.8      | 177.0                                      | 179.3      | 178.8                         | 179.6      |
| N <sub>phen,1</sub> - Ni-N <sub>phen,2</sub>   | 91.0                           | 91.0       | 92.7                                       | 92.4       | 89.6                          | 92.0       |
| N <sub>quin,1</sub> - Ni-N <sub>quin,2</sub>   | 90.6                           | 90.6       | 91.0                                       | 92.6       | 94.0                          | 92.2       |
| N <sub>phen</sub> - Ni-N <sub>quin</sub>       | 160.1                          | 160.0      | 159.5                                      | 157.5      | 160.0                         | 157.9      |

**Table S3.** Fragment contributions (%) to selected ground state ROKS MOs of (<sup>CF</sup><sub>3</sub>L)<sub>2</sub>Ni (**Figure 6**) using Hirshfeld atomic population method (SMD-roPBE0/6-31+G(d,p)//SMD-uO3LYP/6-31+G(d,p)).

| <b>MO</b>                                           | <b>Ni</b> | <b>N<sub>amide</sub></b> | <b>HC=N<sub>phen</sub></b> | <b>HC=N<sub>quin</sub></b> | <b>Ar<sub>phen</sub></b> | <b>Ar<sub>quin</sub></b> | <b>CF<sub>3</sub></b> |
|-----------------------------------------------------|-----------|--------------------------|----------------------------|----------------------------|--------------------------|--------------------------|-----------------------|
| LUMO                                                | 2         | 1                        | 26                         | 6                          | 45                       | 17                       | 2                     |
| SOMO (d <sub>z</sub> <sup>2</sup> )                 | 80        | 9                        | 3                          | 3                          | 2                        | 2                        | 0                     |
| SOMO (d <sub>x</sub> <sup>2</sup> -y <sup>2</sup> ) | 84        | 0                        | 6                          | 6                          | 1                        | 1                        | 0                     |
| HOMO (n <sub>N,am</sub> <sup>π</sup> )              | 4         | 20                       | 3                          | 3                          | 32                       | 37                       | 0                     |
| H-1 (n <sub>N,am</sub> <sup>π</sup> )               | 2         | 21                       | 3                          | 3                          | 32                       | 38                       | 0                     |

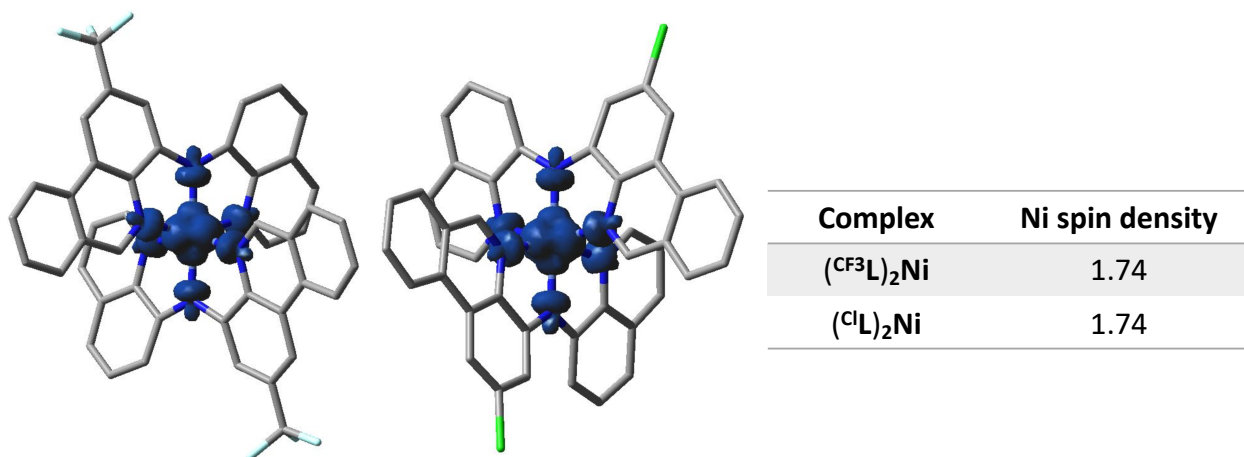

**Figure S8.** Ground state spin density isosurfaces (isovalue = 0.004) and Mulliken spin density on Ni for (<sup>CF3</sup>L)<sub>2</sub>Ni and (<sup>Cl</sup>L)<sub>2</sub>Ni (SMD-uPBE0/6-31+G(d,p)//SMD-uO3LYP/6-31+G(d,p)).

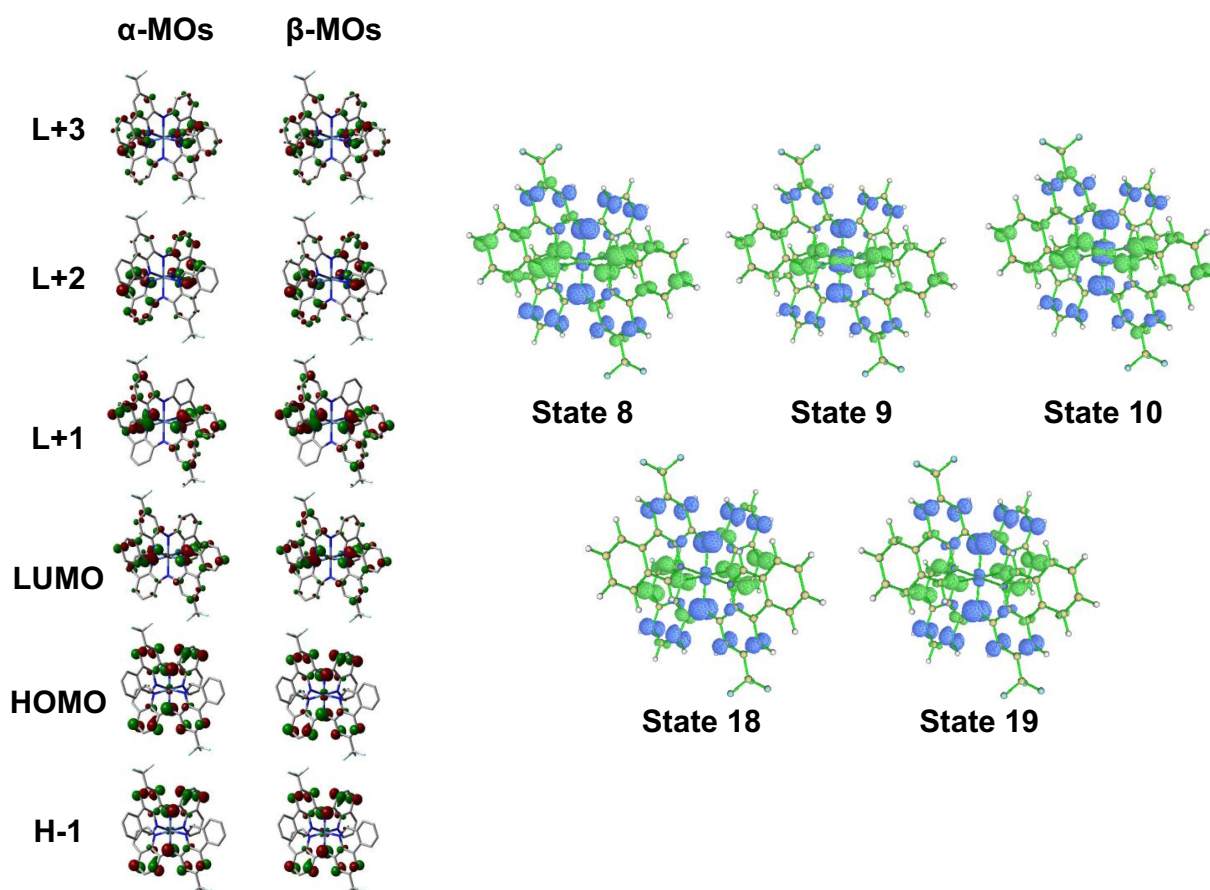

**Figure S9.** Selected molecular orbital isosurfaces (isovalue = 0.04; SMD-uPBE0/6-31+G(d,p)//SMD-uO3LYP/6-31+G(d,p)) and electron-hole density maps (isovalue = 0.002; green = electron, blue = hole) for the lowest energy transitions in (<sup>CF3</sup>L)<sub>2</sub>Ni ( $E < 3$  eV).

**Table S4.** Fragment contributions ( $\alpha/\beta$ ; %) to selected ground state UKS MOs of  $(\text{CF}_3\text{L})_2\text{Ni}$  using Hirshfeld atomic population method (SMD-uPBE0/6-31+G(d,p)//SMD-uO3LYP/6-31+G(d,p)).

| MO   | Ni  | N <sub>amide</sub> | HC=N <sup>phen</sup> | HC=N <sup>quin</sup> | Ar <sup>phen</sup> | Ar <sup>quin</sup> | CF <sub>3</sub> |
|------|-----|--------------------|----------------------|----------------------|--------------------|--------------------|-----------------|
| L+3  | 1/1 | 1/1                | 8/7                  | 18/17                | 33/36              | 38/36              | 1/1             |
| L+2  | 1/1 | 2/2                | 1/2                  | 23/22                | 18/21              | 54/52              | 0/0             |
| L+1  | 1/1 | 1/1                | 32/31                | 1/1                  | 58/58              | 4/5                | 3/3             |
| LUMO | 1/2 | 1/1                | 26/25                | 6/6                  | 46/46              | 18/18              | 2/2             |
| HOMO | 3/5 | 20/20              | 3/3                  | 3/3                  | 32/32              | 38/37              | 0/0             |
| H-1  | 2/3 | 21/21              | 3/3                  | 3/3                  | 32/32              | 38/37              | 0/0             |

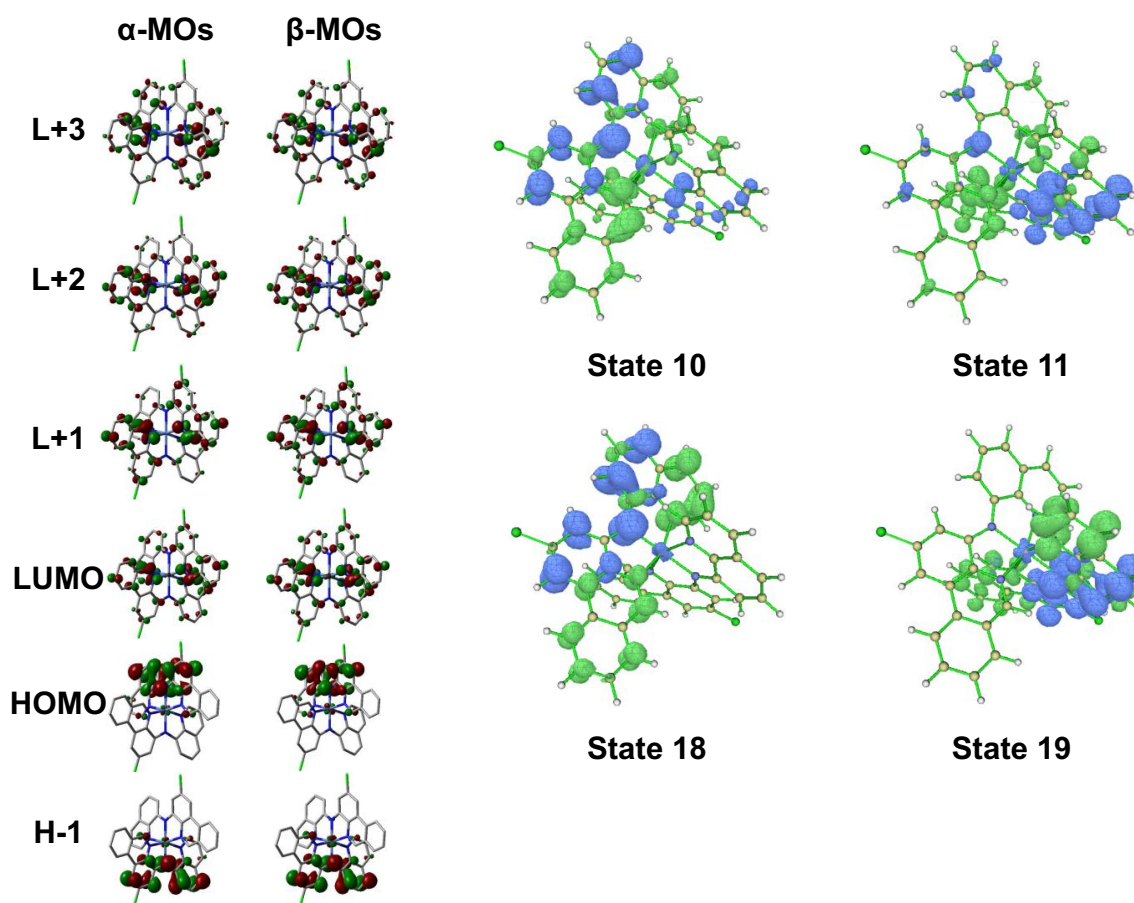

**Figure S10.** Selected molecular orbital isosurfaces (isovalue = 0.04; SMD-uPBE0/6-31+G(d,p)//SMD-uO3LYP/6-31+G(d,p)) and electron-hole density maps (isovalue = 0.002; green = electron, blue = hole) for the lowest energy transitions in  $(\text{ClL})_2\text{Ni}$  ( $E < 3$  eV).

**Table S5.** Fragment contributions ( $\alpha/\beta$ ; %) to selected ground state UKS MOs of  $(\text{C}^{\text{I}}\text{L})_2\text{Ni}$  using Hirshfeld atomic population method (SMD-uPBE0/6-31+G(d,p)//SMD-uO3LYP/6-31+G(d,p)).

| MO   | Ni  | N <sup>amide</sup> | HC=N <sup>phen</sup> | HC=N <sup>quin</sup> | Ar <sup>phen</sup> | Ar <sup>quin</sup> | Cl  |
|------|-----|--------------------|----------------------|----------------------|--------------------|--------------------|-----|
| L+3  | 1/1 | 1/1                | 7/7                  | 19/17                | 29/33              | 43/39              | 0/0 |
| L+2  | 1/1 | 1/1                | 13/13                | 16/15                | 36/39              | 32/30              | 1/1 |
| L+1  | 1/1 | 1/1                | 27/26                | 4/5                  | 51/49              | 15/17              | 1/1 |
| LUMO | 1/2 | 1/1                | 22/22                | 9/9                  | 40/40              | 25/25              | 1/1 |
| HOMO | 2/4 | 20/20              | 4/4                  | 3/3                  | 34/33              | 37/36              | 0/0 |
| H-1  | 2/4 | 20/20              | 4/4                  | 3/3                  | 34/33              | 37/36              | 0/0 |

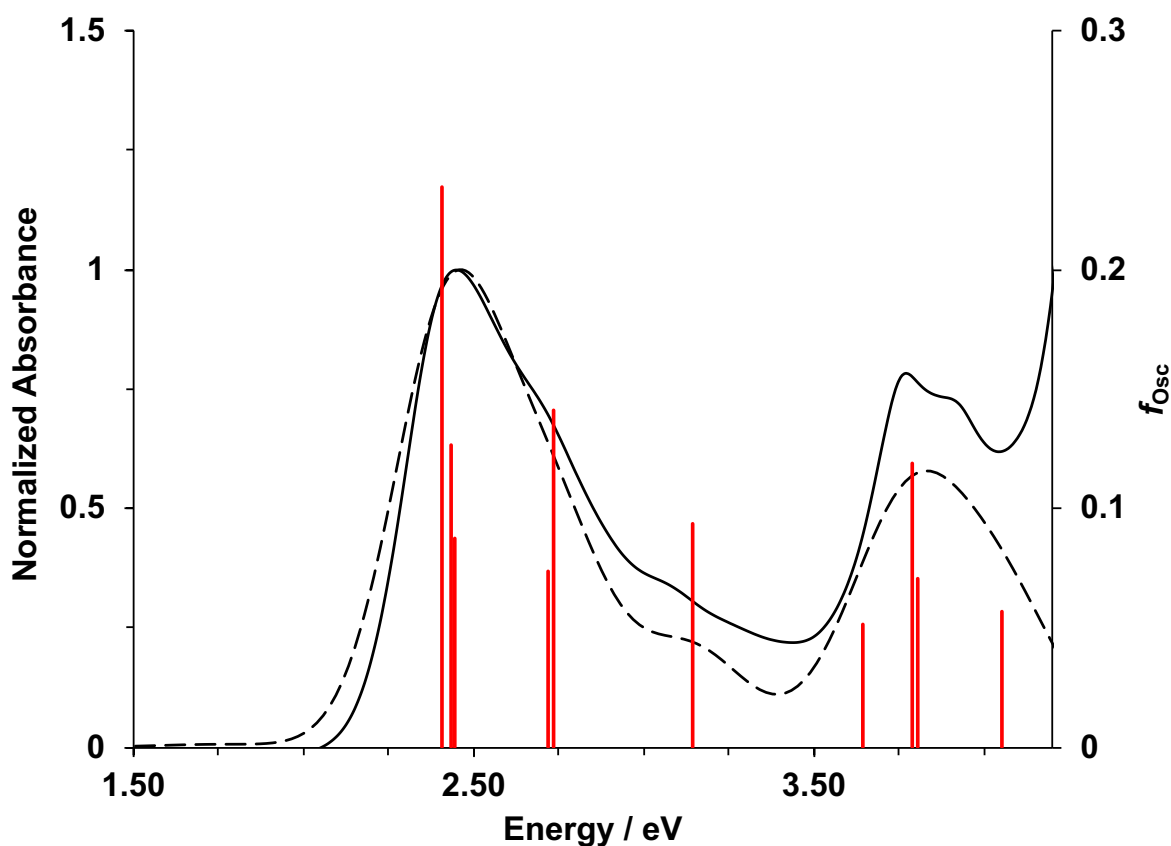

**Figure S11.** TD-DFT simulated spectrum (---) and vertical excitation energies (red) superimposed on the experimental spectrum (-) of  $(\text{C}^{\text{F3}}\text{L})_2\text{Ni}$  in  $\text{CH}_3\text{CN}$  (TD-SMD-uPBE0/6-31+G(d,p)//SMD-uO3LYP/6-31+G(d,p)); FWHM =  $3000\text{ cm}^{-1}$ ;  $f > 0.05$ ).

**Table S6.** TDDFT predicted vertical excitation energies, oscillator strengths ( $f_{\text{osc}} > 0.05$ ), and MO contributions ( $> 10\%$ ) ( $\text{CF}_3\text{L}$ )<sub>2</sub>Ni (TD-SMD-uPBE0/6-31+G(d,p)//SMD-uO3LYP/6-31+G(d,p)); FWHM = 3000 cm<sup>-1</sup>;  $f > 0.05$ ).

| No. | E / eV | $f_{\text{osc}}$ | Major contribs                                                                                             |
|-----|--------|------------------|------------------------------------------------------------------------------------------------------------|
| 8   | 2.40   | 0.23             | HOMO(A)→LUMO(A) (38%), HOMO(B)→LUMO(B) (53%)                                                               |
| 9   | 2.43   | 0.13             | H-1(A)→LUMO(A) (17%), HOMO(A)→L+1(A) (10%), H-1(B)→LUMO(B) (34%)                                           |
| 10  | 2.44   | 0.09             | H-1(A)→LUMO(A) (11%), HOMO(A)→L+1(A) (14%), HOMO(B)→L+1(B) (44%)                                           |
| 18  | 2.72   | 0.07             | H-1(A)→L+3(A) (11%), HOMO(A)→L+2(A) (35%), HOMO(B)→L+2(B) (47%)                                            |
| 19  | 2.74   | 0.14             | H-1(A)→L+2(A) (19%), HOMO(A)→L+3(A) (29%), HOMO(B)→L+3(B) (41%)                                            |
| 30  | 3.14   | 0.09             | H-1(A)→L+4(A) (17%), HOMO(A)→L+5(A) (33%), H-1(B)→L+4(B) (11%), HOMO(B)→L+5(B) (30%)                       |
| 46  | 3.64   | 0.05             | H-1(A)→L+7(A) (22%), HOMO(A)→L+6(A) (20%), H-1(B)→L+7(B) (15%), HOMO(B)→L+6(B) (18%), HOMO(B)→L+8(B) (10%) |
| 51  | 3.79   | 0.12             | H-1(A)→L+8(A) (12%), HOMO(A)→L+6(A) (14%), HOMO(A)→L+9(A) (15%), HOMO(B)→L+6(B) (30%)                      |
| 52  | 3.80   | 0.07             | H-3(A)→L+1(A) (13%), H-1(A)→L+6(A) (13%), HOMO(A)→L+8(A) (17%), H-1(B)→L+6(B) (25%), HOMO(B)→L+9(B) (12%)  |

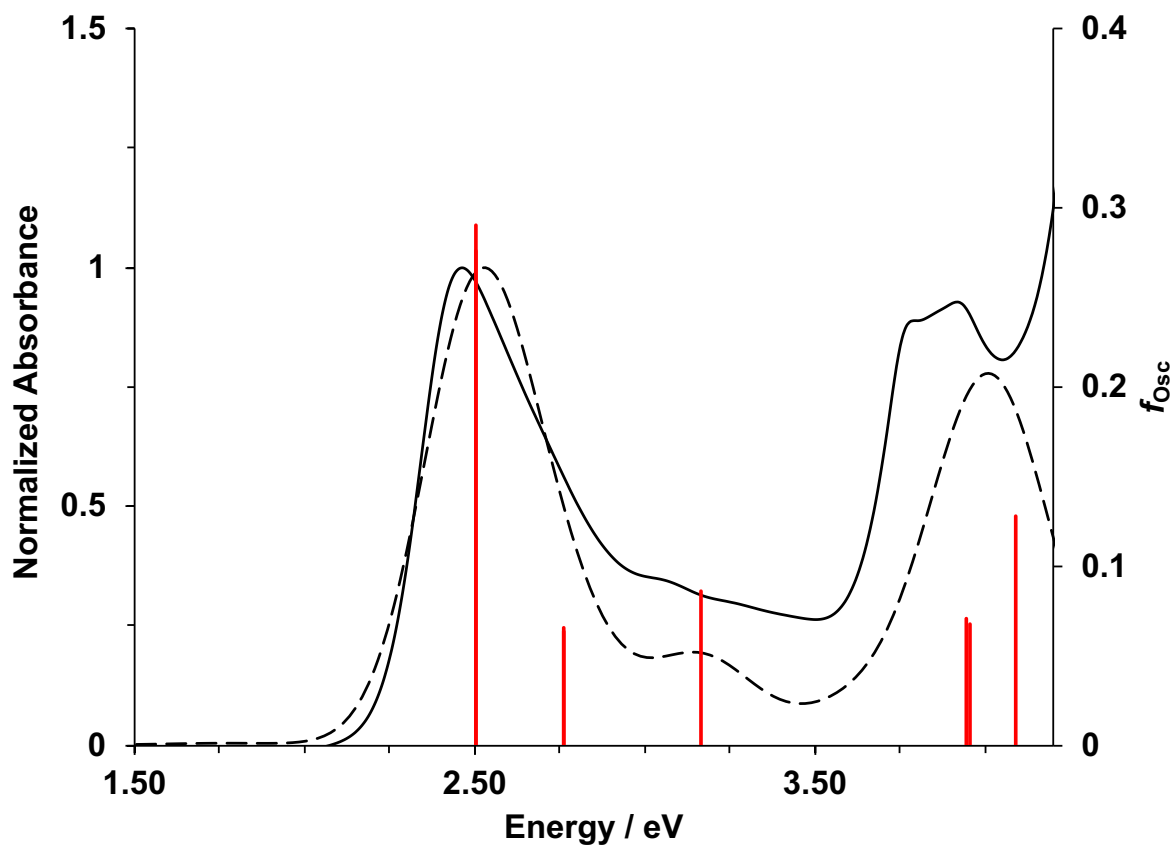

**Figure S12.** TD-DFT simulated spectrum (---) and vertical excitation energies (red) superimposed on the experimental spectrum (-) of  $(\text{Cl})_2\text{Ni}$  in  $\text{CH}_3\text{CN}$  (TD-SMD-uPBE0/6-31+G(d,p)//SMD-uO3LYP/6-31+G(d,p)); FWHM =  $3000\text{ cm}^{-1}$ ;  $f > 0.05$ ).

**Table S7.** TDDFT predicted vertical excitation energies, oscillator strengths ( $f_{\text{osc}} > 0.05$ ), and MO contributions ( $> 10\%$ ) ( $\text{C}^{\text{I}}\text{L}$ )<sub>2</sub>Ni (TD-SMD-uPBE0/6-31+G(d,p)//SMD-uO3LYP/6-31+G(d,p)).

| No. | E / eV | $f_{\text{osc}}$ | Major contribs                                                                                                                        |
|-----|--------|------------------|---------------------------------------------------------------------------------------------------------------------------------------|
| 10  | 2.50   | 0.28             | HOMO(A)→LUMO(A) (35%), HOMO(B)→LUMO(B) (33%)                                                                                          |
| 11  | 2.50   | 0.29             | H-1(A)→LUMO(A) (35%), H-1(B)→LUMO(B) (33%)                                                                                            |
| 18  | 2.76   | 0.06             | HOMO(A)→L+2(A) (27%), HOMO(A)→L+3(A) (23%),<br>HOMO(B)→L+2(B) (29%), HOMO(B)→L+3(B) (15%)                                             |
| 19  | 2.76   | 0.07             | H-1(A)→L+2(A) (28%), H-1(A)→L+3(A) (22%), H-1(B)→L+2(B)<br>(25%), H-1(B)→L+3(B) (19%)                                                 |
| 29  | 3.17   | 0.09             | H-1(A)→L+4(A) (12%), H-1(A)→L+5(A) (13%),<br>HOMO(A)→L+4(A) (17%), H-1(B)→L+4(B) (10%), H-<br>1(B)→L+5(B) (10%), HOMO(B)→L+4(B) (15%) |
| 58  | 3.95   | 0.07             | H-1(B)→L+8(B) (24%)                                                                                                                   |
| 59  | 3.96   | 0.07             | H-2(A)→L+4(A) (15%), HOMO(A)→L+8(A) (10%),<br>HOMO(B)→L+9(B) (20%)                                                                    |
| 70  | 4.09   | 0.13             | H-5(A)→LUMO(A) (14%), H-2(A)→L+5(A) (19%), H-<br>3(B)→LUMO(B) (13%)                                                                   |

### Equations – IVCT Marcus-Hush Analysis

$$E_{\text{OP}} = \lambda \quad (1)$$

$$H_{\text{ab}} (\text{cm}^{-1}) = [(4.2 \times 10^{-4}) \epsilon_{\text{max}} \Delta v_{1/2} E_{\text{OP}}]^{1/2} / d \quad (2)$$

$$\Delta G^* (\text{cm}^{-1}) = (\lambda - 2H_{\text{ab}})^2 / 4\lambda \quad (3)$$

$$k_{\text{ct}} = (2H_{\text{ab}}^2 / h) [\pi^3 / \lambda k_{\text{B}} T]^{1/2} \exp - (\Delta G^* / k_{\text{B}} T) \quad (4)$$



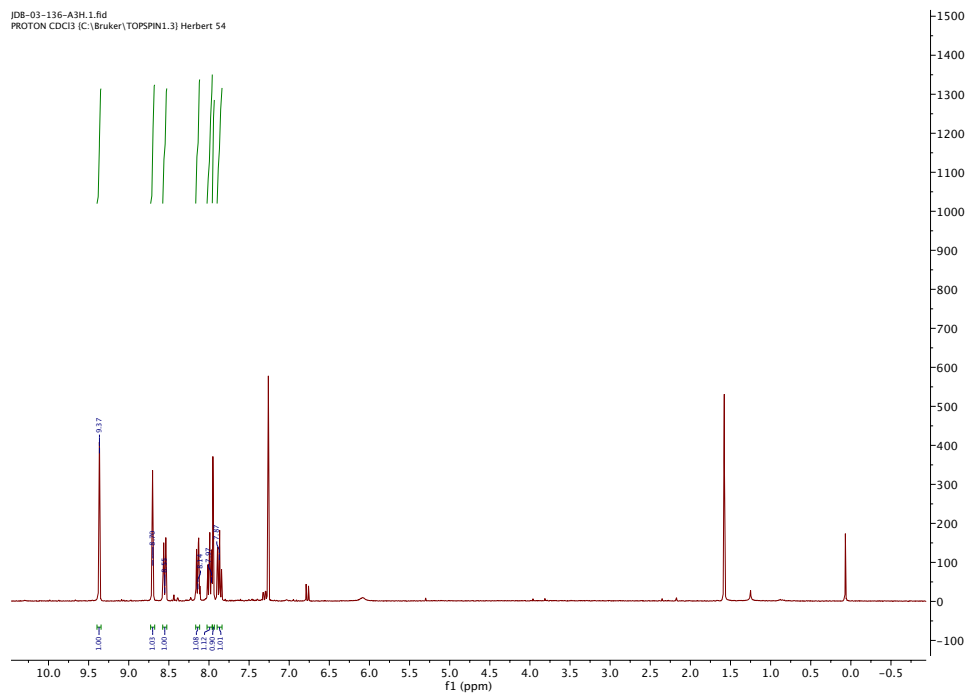

**Figure S13.**  $^1\text{H}$  NMR (300 MHz,  $\text{CDCl}_3$ ,  $25^\circ\text{C}$ ) of 4-nitro-2-chlorophenanthridine (**1c**).

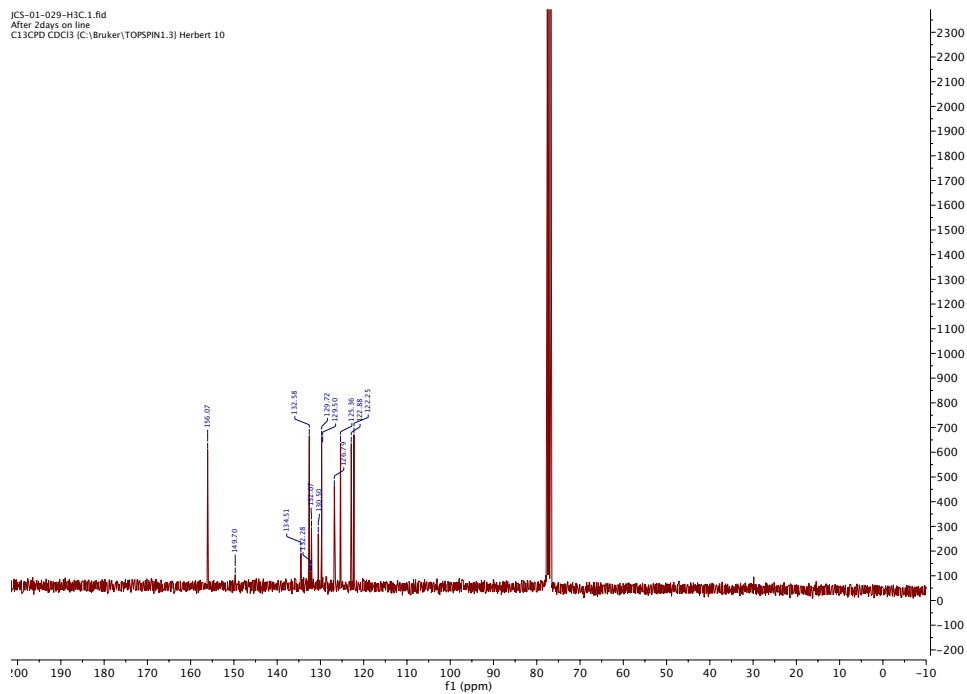

**Figure S14.**  $^{13}\text{C}\{^1\text{H}\}$  NMR (75 MHz,  $\text{CDCl}_3$ ,  $25^\circ\text{C}$ ) of 4-nitro-2-chlorophenanthridine (**1c**).

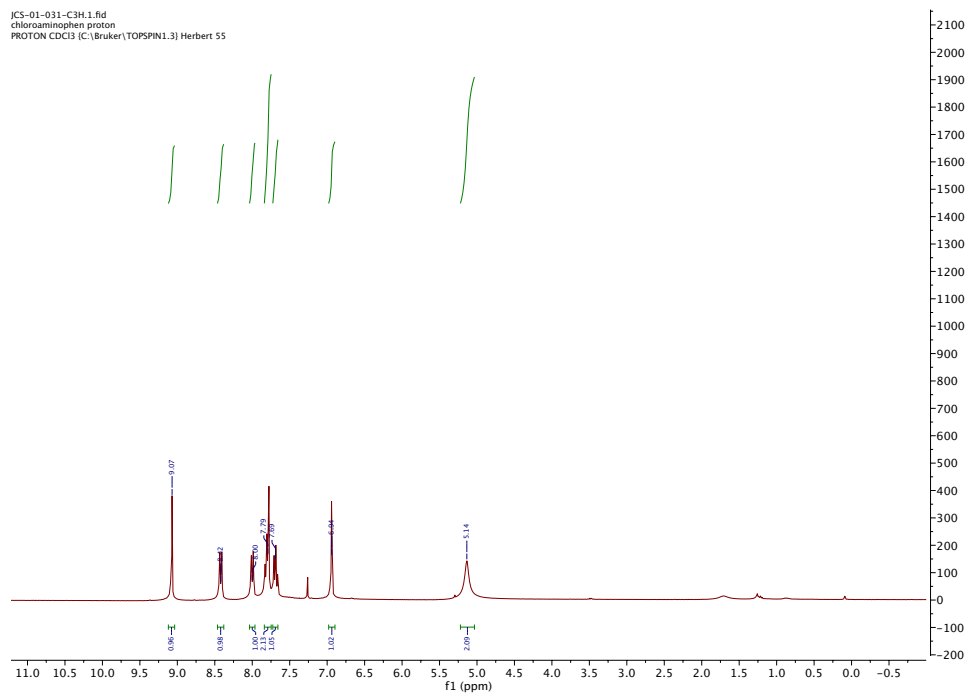

**Figure S15.**  $^1\text{H}$  NMR (300 MHz,  $\text{CDCl}_3$ ,  $25^\circ\text{C}$ ) of 4-amino-2-chlorophenanthridine (**1e**).

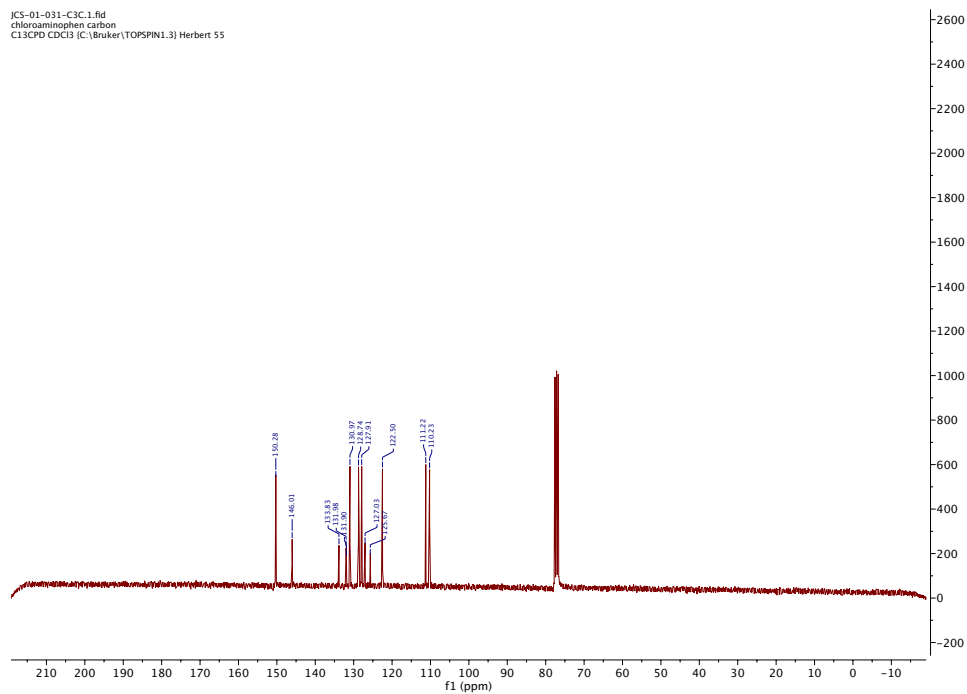

**Figure S16.**  $^{13}\text{C}\{^1\text{H}\}$  NMR (75 MHz,  $\text{CDCl}_3$ ,  $25^\circ\text{C}$ ) of 4-amino-2-chlorophenanthridine (**1e**).

JDB-04-15-ASH.1.fid  
PROTON CDCl3 C:\ Herbert 1

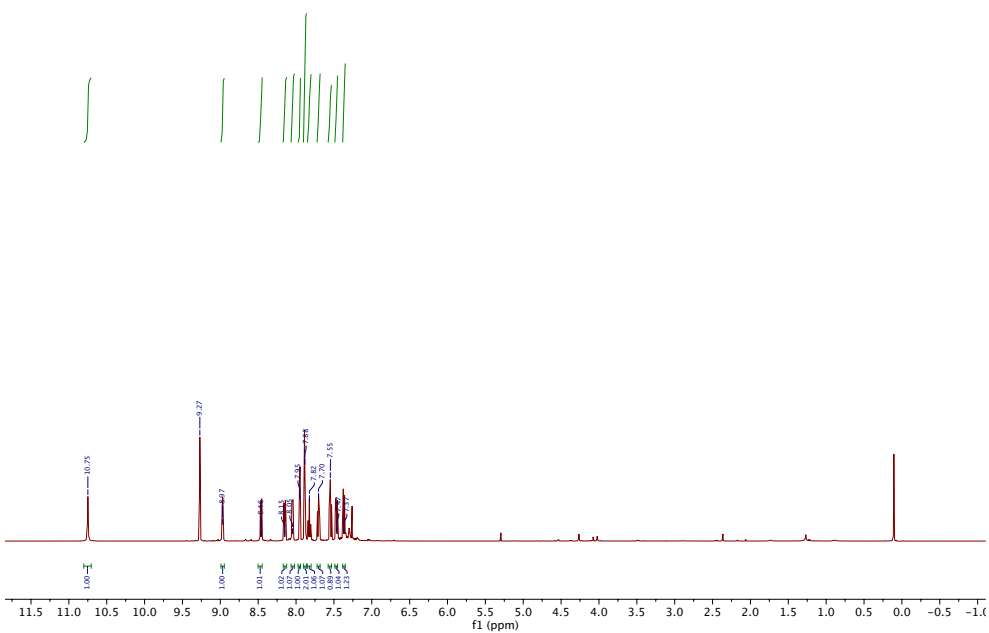

**Figure S17.** <sup>1</sup>H NMR (500 MHz, CDCl<sub>3</sub>, 25°C) of Cl-PhenNN(H)N<sup>Quin</sup> (**L3**).

JDB-04-15-ASC.1.fid  
C13CPD CDCl3 C:\ Herbert 1

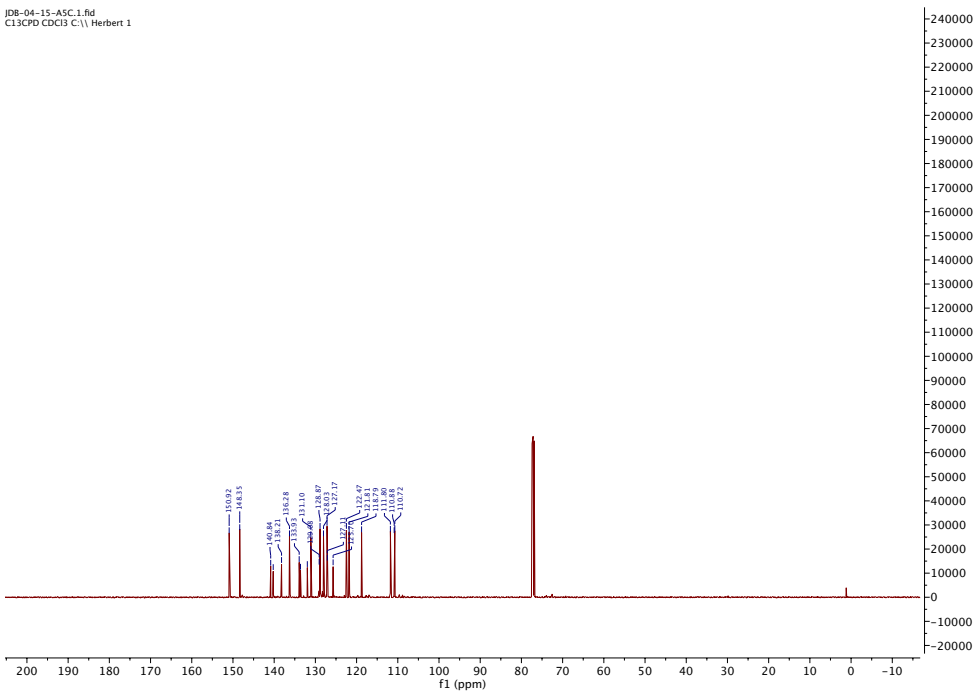

**Figure S18.** <sup>13</sup>C {<sup>1</sup>H} NMR (125 MHz, CDCl<sub>3</sub>, 25°C) of Cl-PhenNN(H)N<sup>Quin</sup> (**L3**).

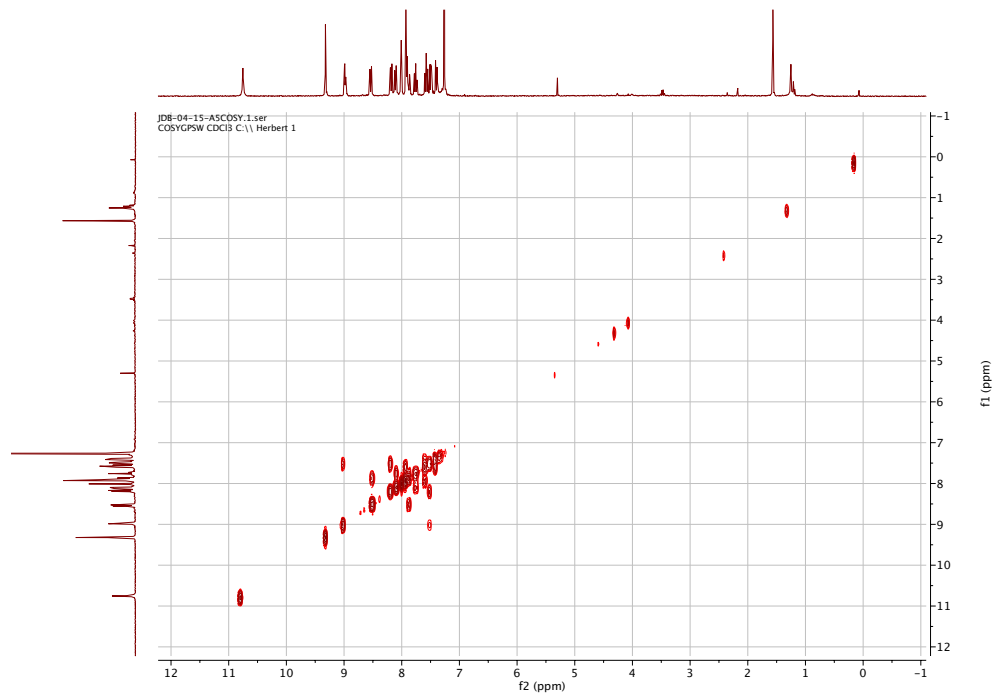

**Figure S19.**  $^1\text{H}$ - $^1\text{H}$  COSY NMR (500/125 MHz,  $\text{CDCl}_3$ ,  $25^\circ\text{C}$ ) of  $\text{Cl-PhenNN(H)N}^{\text{Quin}}$  (**L3**).

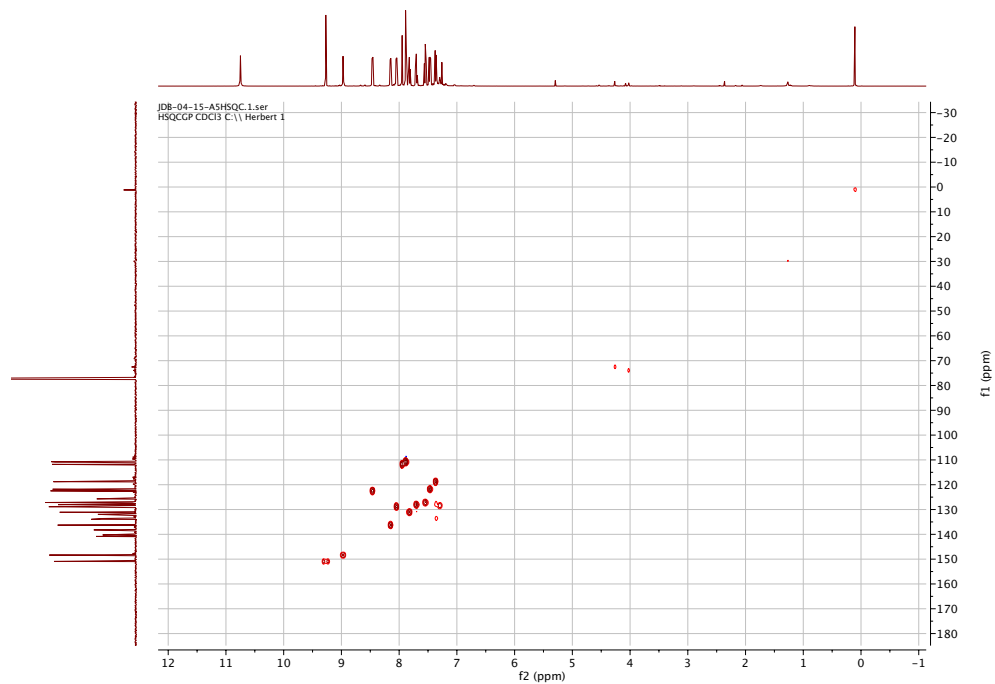

**Figure S20.** HSQC NMR (500/125 MHz,  $\text{CDCl}_3$ ,  $25^\circ\text{C}$ ) of  $\text{Cl-PhenNN(H)N}^{\text{Quin}}$  (**L3**).

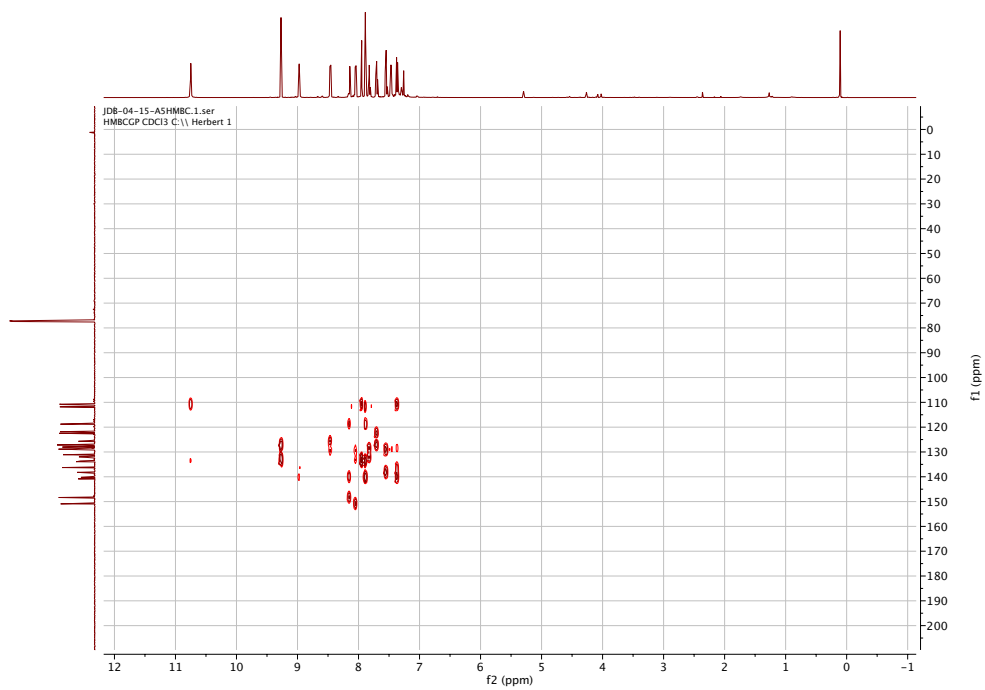

**Figure S21.** HMBC NMR (500/125 MHz,  $\text{CDCl}_3$ , 25°C) of  $\text{Cl-PhenNN(H)N}^{\text{Quin}}$  (**L3**).

# Generic Display Report (all)

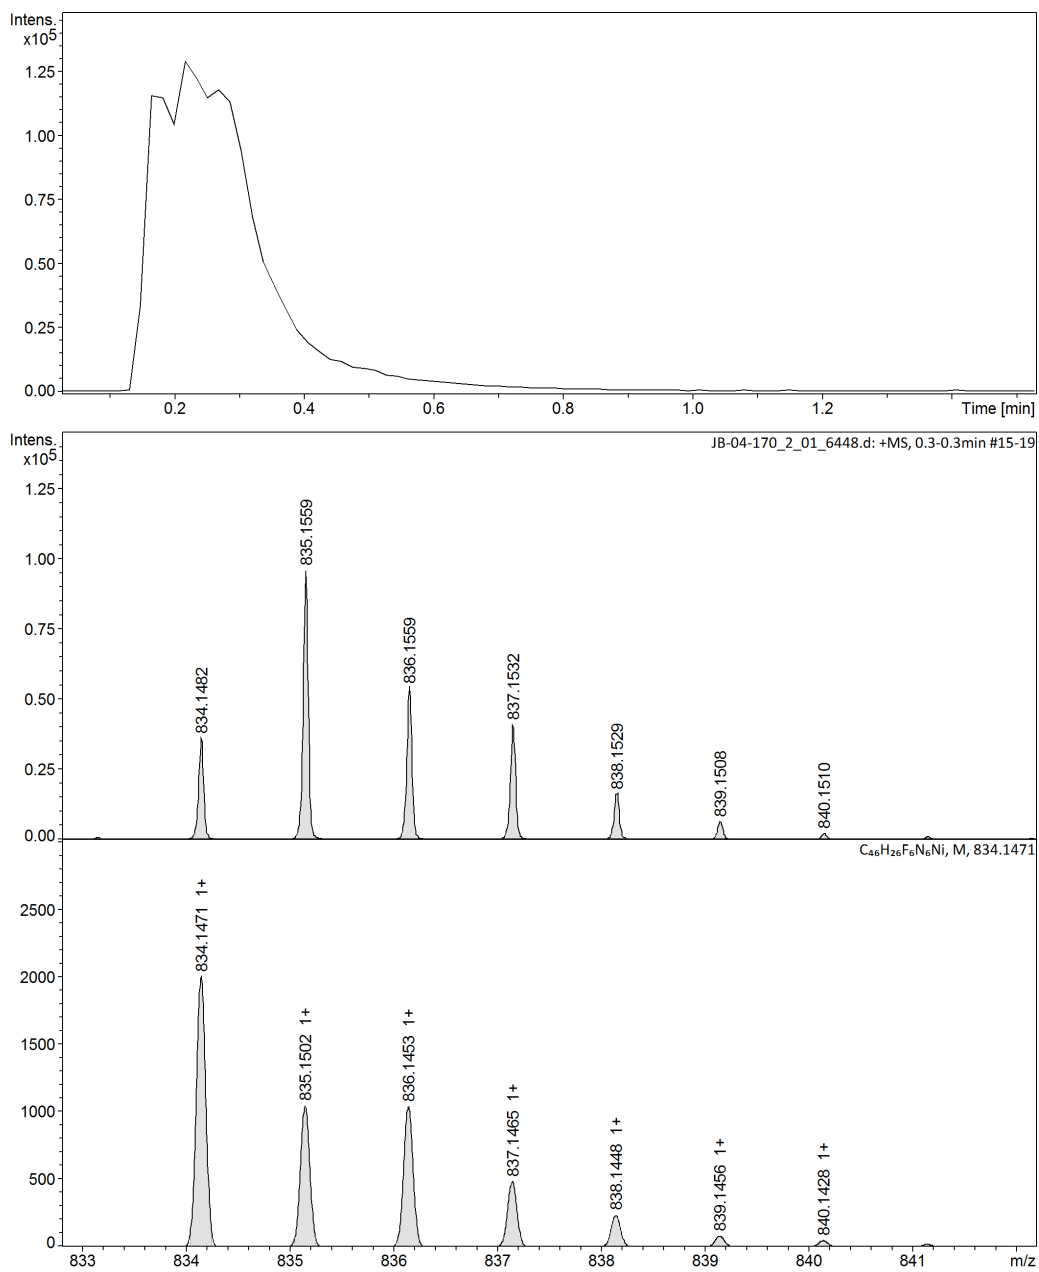

Figure S22. HR-MS of (CF<sub>3</sub>L)<sub>2</sub>Ni.

# Generic Display Report (all)

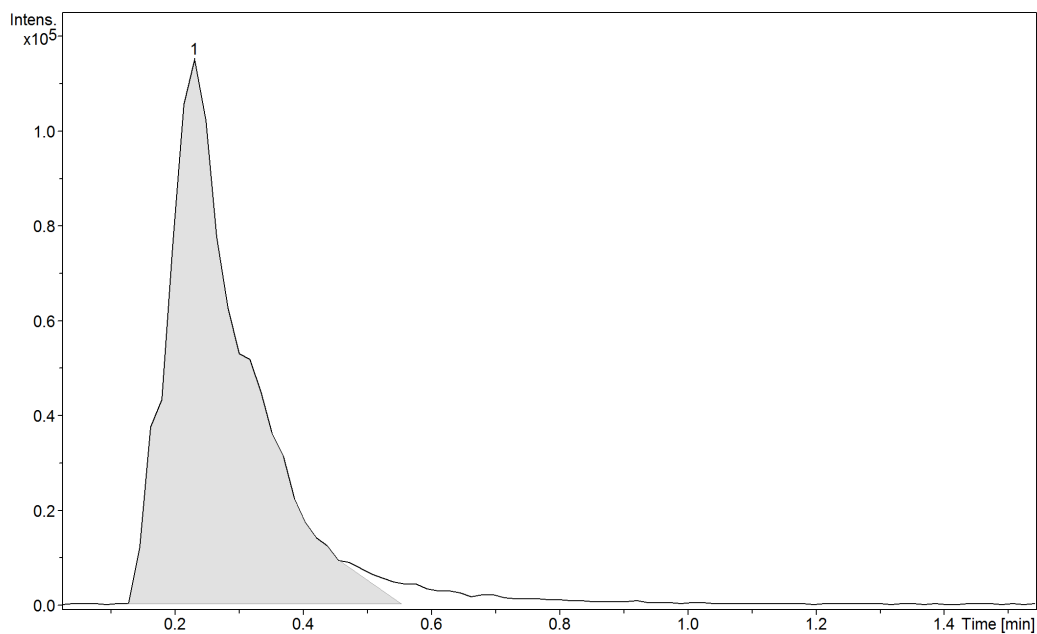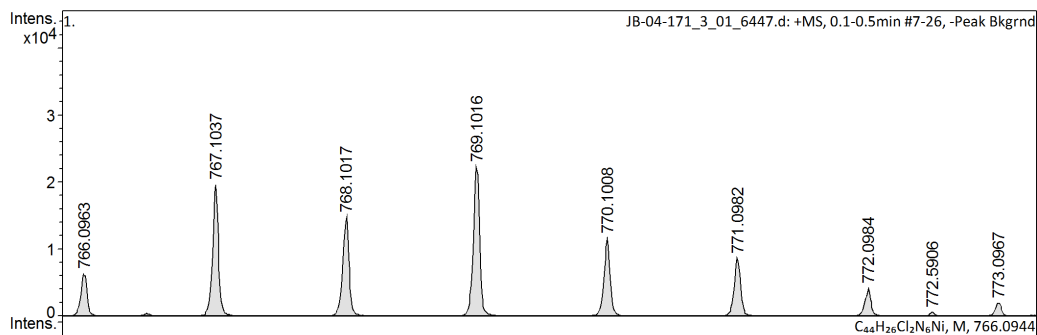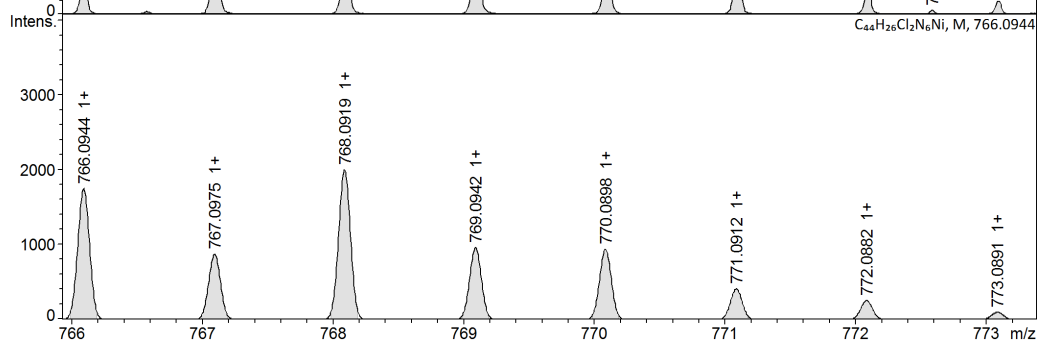

Figure S23. HR-MS of (C<sup>1</sup>L)<sub>2</sub>Ni.

## Energies and Reaction Coordinates

### (CF<sub>3</sub>L)<sub>2</sub>Ni

HF=-4204.0077074 Hartrees

Zero-point correction=

0.614886 (Hartree/Particle)

Thermal correction to Gibbs Free Energy=

0.532276

Sum of electronic and zero-point Energies=

-4203.392821

Sum of electronic and thermal Free Energies=

-4203.475432

Standard orientation:

| Center<br>Number | Atomic<br>Number | Atomic<br>Type | Coordinates (Angstroms) |           |           |
|------------------|------------------|----------------|-------------------------|-----------|-----------|
|                  |                  |                | X                       | Y         | Z         |
| 1                | 6                | 0              | -0.817190               | -2.008570 | 1.506040  |
| 2                | 1                | 0              | 0.213840                | -2.344160 | 1.432690  |
| 3                | 6                | 0              | -1.707190               | -2.676860 | 2.399240  |
| 4                | 6                | 0              | -1.254380               | -3.746000 | 3.209980  |
| 5                | 1                | 0              | -0.211590               | -4.046900 | 3.151430  |
| 6                | 6                | 0              | -2.131630               | -4.392830 | 4.060340  |
| 7                | 1                | 0              | -1.788210               | -5.212980 | 4.684650  |
| 8                | 6                | 0              | -3.480400               | -3.981839 | 4.113570  |
| 9                | 1                | 0              | -4.170330               | -4.488759 | 4.783140  |
| 10               | 6                | 0              | -3.941110               | -2.938649 | 3.324970  |
| 11               | 1                | 0              | -4.983810               | -2.651779 | 3.397920  |
| 12               | 6                | 0              | -3.066440               | -2.255889 | 2.446100  |
| 13               | 6                | 0              | -3.464870               | -1.150219 | 1.589480  |
| 14               | 6                | 0              | -2.466940               | -0.534359 | 0.788160  |
| 15               | 6                | 0              | -2.756820               | 0.616981  | -0.047980 |
| 16               | 6                | 0              | -4.107430               | 1.011911  | -0.122240 |
| 17               | 1                | 0              | -4.411780               | 1.794231  | -0.801550 |
| 18               | 6                | 0              | -5.089390               | 0.366931  | 0.646490  |
| 19               | 6                | 0              | -4.794090               | -0.674879 | 1.514490  |
| 20               | 1                | 0              | -5.576790               | -1.125269 | 2.108240  |
| 21               | 6                | 0              | -6.508240               | 0.856451  | 0.509020  |
| 22               | 6                | 0              | 1.560450                | 1.538680  | -2.974220 |
| 23               | 1                | 0              | 2.261140                | 0.711520  | -2.908910 |
| 24               | 6                | 0              | 1.814380                | 2.627110  | -3.833530 |
| 25               | 1                | 0              | 2.710140                | 2.630030  | -4.446930 |
| 26               | 6                | 0              | 0.920470                | 3.676420  | -3.855860 |
| 27               | 1                | 0              | 1.094990                | 4.543800  | -4.487700 |
| 28               | 6                | 0              | -0.241110               | 3.636610  | -3.040730 |
| 29               | 6                | 0              | -0.438410               | 2.470950  | -2.235970 |
| 30               | 6                | 0              | -1.620850               | 2.319680  | -1.403660 |
| 31               | 6                | 0              | -2.489630               | 3.425151  | -1.354690 |
| 32               | 1                | 0              | -3.342200               | 3.425241  | -0.689860 |
| 33               | 6                | 0              | -2.265200               | 4.581150  | -2.130400 |
| 34               | 1                | 0              | -2.976620               | 5.400091  | -2.049300 |
| 35               | 6                | 0              | -1.184630               | 4.695860  | -2.984460 |
| 36               | 1                | 0              | -1.034450               | 5.581910  | -3.594470 |
| 37               | 6                | 0              | 0.817340                | 2.008280  | 1.506280  |
| 38               | 1                | 0              | -0.213690               | 2.343880  | 1.433080  |
| 39               | 6                | 0              | 1.707440                | 2.676460  | 2.399470  |



|    |    |   |           |           |           |
|----|----|---|-----------|-----------|-----------|
| 40 | 6  | 0 | 1.254730  | 3.745510  | 3.210380  |
| 41 | 1  | 0 | 0.211940  | 4.046430  | 3.151970  |
| 42 | 6  | 0 | 2.132060  | 4.392220  | 4.060740  |
| 43 | 1  | 0 | 1.788710  | 5.212280  | 4.685200  |
| 44 | 6  | 0 | 3.480830  | 3.981210  | 4.113790  |
| 45 | 1  | 0 | 4.170830  | 4.488040  | 4.783350  |
| 46 | 6  | 0 | 3.941450  | 2.938110  | 3.325010  |
| 47 | 1  | 0 | 4.984150  | 2.651230  | 3.397830  |
| 48 | 6  | 0 | 3.066690  | 2.255470  | 2.446140  |
| 49 | 6  | 0 | 3.465020  | 1.149880  | 1.589380  |
| 50 | 6  | 0 | 2.467010  | 0.534140  | 0.788060  |
| 51 | 6  | 0 | 2.756780  | -0.617110 | -0.048240 |
| 52 | 6  | 0 | 4.107350  | -1.012210 | -0.122490 |
| 53 | 1  | 0 | 4.411600  | -1.794630 | -0.801730 |
| 54 | 6  | 0 | 5.089400  | -0.367340 | 0.646220  |
| 55 | 6  | 0 | 4.794220  | 0.674480  | 1.514270  |
| 56 | 1  | 0 | 5.576990  | 1.124830  | 2.107930  |
| 57 | 6  | 0 | 6.508180  | -0.857090 | 0.508820  |
| 58 | 6  | 0 | -1.560330 | -1.537430 | -2.975040 |
| 59 | 1  | 0 | -2.260910 | -0.710200 | -2.909540 |
| 60 | 6  | 0 | -1.814280 | -2.625530 | -3.834760 |
| 61 | 1  | 0 | -2.709920 | -2.628089 | -4.448340 |
| 62 | 6  | 0 | -0.920560 | -3.675010 | -3.857240 |
| 63 | 1  | 0 | -1.095150 | -4.542170 | -4.489350 |
| 64 | 6  | 0 | 0.240880  | -3.635660 | -3.041890 |
| 65 | 6  | 0 | 0.438260  | -2.470260 | -2.236760 |
| 66 | 6  | 0 | 1.620640  | -2.319400 | -1.404290 |
| 67 | 6  | 0 | 2.489200  | -3.425040 | -1.355480 |
| 68 | 1  | 0 | 3.341670  | -3.425480 | -0.690520 |
| 69 | 6  | 0 | 2.264680  | -4.580800 | -2.131540 |
| 70 | 1  | 0 | 2.975950  | -5.399880 | -2.050560 |
| 71 | 6  | 0 | 1.184220  | -4.695080 | -2.985790 |
| 72 | 1  | 0 | 1.033970  | -5.580930 | -3.596070 |
| 73 | 9  | 0 | 6.952160  | -0.795230 | -0.779950 |
| 74 | 9  | 0 | 6.643900  | -2.163070 | 0.882860  |
| 75 | 9  | 0 | 7.398580  | -0.157000 | 1.250580  |
| 76 | 7  | 0 | -1.172570 | -1.001900 | 0.747690  |
| 77 | 7  | 0 | -1.691930 | 1.136820  | -0.719010 |
| 78 | 7  | 0 | 0.482410  | 1.466060  | -2.205870 |
| 79 | 7  | 0 | 1.172640  | 1.001700  | 0.747770  |
| 80 | 7  | 0 | 1.691880  | -1.136700 | -0.719420 |
| 81 | 7  | 0 | -0.482410 | -1.465250 | -2.206470 |
| 82 | 28 | 0 | -0.000040 | 0.000070  | -0.731030 |
| 83 | 9  | 0 | -6.952370 | 0.793931  | -0.779650 |
| 84 | 9  | 0 | -6.644090 | 2.162601  | 0.882480  |
| 85 | 9  | 0 | -7.398490 | 0.156661  | 1.251280  |

## (<sup>Cl</sup>L)<sub>2</sub>Ni

HF= -4449.2607093 Hartrees

Zero-point correction=

0.588006 (Hartree/Particle)

Thermal correction to Gibbs Free Energy=

0.513597

Sum of electronic and zero-point Energies=

-4448.672704

Sum of electronic and thermal Free Energies=

-4448.747113

## Standard orientation:

| Center<br>Number | Atomic<br>Number | Atomic<br>Type | Coordinates (Angstroms) |           |           |
|------------------|------------------|----------------|-------------------------|-----------|-----------|
|                  |                  |                | X                       | Y         | Z         |
| 1                | 6                | 0              | 0.412885                | 2.445825  | 0.548616  |
| 2                | 1                | 0              | -0.600347               | 2.434041  | 0.940363  |
| 3                | 6                | 0              | 1.101572                | 3.690218  | 0.429336  |
| 4                | 6                | 0              | 0.469470                | 4.907731  | 0.781412  |
| 5                | 1                | 0              | -0.556440               | 4.884322  | 1.139741  |
| 6                | 6                | 0              | 1.151701                | 6.104660  | 0.667188  |
| 7                | 1                | 0              | 0.668422                | 7.040314  | 0.934476  |
| 8                | 6                | 0              | 2.483052                | 6.105690  | 0.199677  |
| 9                | 1                | 0              | 3.019712                | 7.046319  | 0.107566  |
| 10               | 6                | 0              | 3.118331                | 4.922896  | -0.145941 |
| 11               | 1                | 0              | 4.140864                | 4.965296  | -0.503126 |
| 12               | 6                | 0              | 2.444802                | 3.682062  | -0.041640 |
| 13               | 6                | 0              | 3.038145                | 2.399026  | -0.384276 |
| 14               | 6                | 0              | 2.225627                | 1.237930  | -0.271389 |
| 15               | 6                | 0              | 2.718490                | -0.079184 | -0.635927 |
| 16               | 6                | 0              | 4.081113                | -0.163231 | -0.999265 |
| 17               | 1                | 0              | 4.554011                | -1.114881 | -1.183722 |
| 18               | 6                | 0              | 4.858769                | 0.995040  | -1.072628 |
| 19               | 6                | 0              | 4.380730                | 2.266809  | -0.808259 |
| 20               | 1                | 0              | 5.030710                | 3.125354  | -0.907261 |
| 21               | 6                | 0              | -1.036466               | -3.544947 | 0.785724  |
| 22               | 1                | 0              | -1.805989               | -3.064459 | 1.382159  |
| 23               | 6                | 0              | -1.082284               | -4.932039 | 0.539469  |
| 24               | 1                | 0              | -1.884495               | -5.527309 | 0.964599  |
| 25               | 6                | 0              | -0.108435               | -5.495547 | -0.256946 |
| 26               | 1                | 0              | -0.121745               | -6.558222 | -0.486204 |
| 27               | 6                | 0              | 0.921477                | -4.683810 | -0.800337 |
| 28               | 6                | 0              | 0.911834                | -3.294158 | -0.460947 |
| 29               | 6                | 0              | 1.942299                | -2.390150 | -0.947763 |
| 30               | 6                | 0              | 2.871750                | -2.942403 | -1.848429 |
| 31               | 1                | 0              | 3.609105                | -2.317612 | -2.331440 |
| 32               | 6                | 0              | 2.855126                | -4.310246 | -2.190973 |
| 33               | 1                | 0              | 3.606378                | -4.673680 | -2.888690 |
| 34               | 6                | 0              | 1.925193                | -5.188261 | -1.668228 |
| 35               | 1                | 0              | 1.933444                | -6.243872 | -1.923813 |
| 36               | 6                | 0              | -0.961725               | -0.501634 | -2.470447 |
| 37               | 1                | 0              | 0.022204                | -0.885203 | -2.725440 |
| 38               | 6                | 0              | -1.882672               | -0.188634 | -3.514976 |
| 39               | 6                | 0              | -1.542317               | -0.401744 | -4.873073 |
| 40               | 1                | 0              | -0.566707               | -0.816974 | -5.112598 |
| 41               | 6                | 0              | -2.441945               | -0.085111 | -5.873937 |
| 42               | 1                | 0              | -2.184080               | -0.248615 | -6.916620 |
| 43               | 6                | 0              | -3.701294               | 0.453386  | -5.534236 |
| 44               | 1                | 0              | -4.409671               | 0.700689  | -6.320542 |
| 45               | 6                | 0              | -4.049640               | 0.671463  | -4.210224 |
| 46               | 1                | 0              | -5.026898               | 1.084657  | -3.987943 |
| 47               | 6                | 0              | -3.150056               | 0.355877  | -3.163786 |
| 48               | 6                | 0              | -3.438068               | 0.555249  | -1.752310 |
| 49               | 6                | 0              | -2.454281               | 0.152769  | -0.808620 |
| 50               | 6                | 0              | -2.672484               | 0.273792  | 0.622304  |
| 51               | 6                | 0              | -3.864357               | 0.916043  | 1.025413  |
| 52               | 1                | 0              | -4.055312               | 1.139501  | 2.063107  |

|    |    |   |           |           |           |
|----|----|---|-----------|-----------|-----------|
| 53 | 6  | 0 | -4.797867 | 1.324002  | 0.069500  |
| 54 | 6  | 0 | -4.640807 | 1.140439  | -1.293486 |
| 55 | 1  | 0 | -5.412889 | 1.458254  | -1.980731 |
| 56 | 6  | 0 | 1.912981  | -0.988868 | 2.970274  |
| 57 | 1  | 0 | 2.713928  | -1.079208 | 2.242801  |
| 58 | 6  | 0 | 2.176933  | -1.133631 | 4.347355  |
| 59 | 1  | 0 | 3.192485  | -1.319104 | 4.683364  |
| 60 | 6  | 0 | 1.125499  | -1.052822 | 5.235106  |
| 61 | 1  | 0 | 1.286316  | -1.179861 | 6.302859  |
| 62 | 6  | 0 | -0.189859 | -0.815208 | 4.757254  |
| 63 | 6  | 0 | -0.355611 | -0.637735 | 3.347512  |
| 64 | 6  | 0 | -1.661724 | -0.362487 | 2.769460  |
| 65 | 6  | 0 | -2.750092 | -0.391278 | 3.661034  |
| 66 | 1  | 0 | -3.763130 | -0.295329 | 3.297332  |
| 67 | 6  | 0 | -2.573041 | -0.589325 | 5.045938  |
| 68 | 1  | 0 | -3.456384 | -0.594193 | 5.680742  |
| 69 | 6  | 0 | -1.324645 | -0.772008 | 5.609092  |
| 70 | 1  | 0 | -1.198054 | -0.905191 | 6.679605  |
| 71 | 17 | 0 | 6.551801  | 0.817236  | -1.534169 |
| 72 | 17 | 0 | -6.264436 | 2.118230  | 0.643724  |
| 73 | 7  | 0 | 0.938656  | 1.294143  | 0.213318  |
| 74 | 7  | 0 | 1.821193  | -1.096273 | -0.515844 |
| 75 | 7  | 0 | -0.078804 | -2.761421 | 0.309152  |
| 76 | 7  | 0 | -1.232667 | -0.347089 | -1.198409 |
| 77 | 7  | 0 | -1.662108 | -0.183831 | 1.411890  |
| 78 | 7  | 0 | 0.700104  | -0.747592 | 2.491885  |
| 79 | 28 | 0 | 0.081646  | -0.642936 | 0.453618  |

**(<sup>t</sup>BuL)<sub>2</sub>Ni (S = 3/2)**

HF= -3844.3447266 Hartrees

Zero-point correction=

0.832030 (Hartree/Particle)

Thermal correction to Gibbs Free Energy=

0.748612

Sum of electronic and zero-point Energies=

-3843.512697

Sum of electronic and thermal Free Energies=

-3843.596114

Standard orientation:

| Center<br>Number | Atomic<br>Number | Atomic<br>Type | Coordinates (Angstroms) |           |           |
|------------------|------------------|----------------|-------------------------|-----------|-----------|
|                  |                  |                | X                       | Y         | Z         |
| 1                | 6                | 0              | -0.072980               | -2.125885 | -1.118922 |
| 2                | 1                | 0              | 0.968553                | -1.949422 | -1.370435 |
| 3                | 6                | 0              | -0.636700               | -3.415059 | -1.356675 |
| 4                | 6                | 0              | 0.158275                | -4.468329 | -1.871209 |
| 5                | 1                | 0              | 1.209473                | -4.283382 | -2.076868 |
| 6                | 6                | 0              | -0.400416               | -5.711235 | -2.103254 |
| 7                | 1                | 0              | 0.206402                | -6.522394 | -2.495744 |
| 8                | 6                | 0              | -1.767682               | -5.922518 | -1.825362 |
| 9                | 1                | 0              | -2.206943               | -6.900517 | -2.004059 |
| 10               | 6                | 0              | -2.561639               | -4.901583 | -1.325753 |
| 11               | 1                | 0              | -3.606686               | -5.105694 | -1.122790 |
| 12               | 6                | 0              | -2.018485               | -3.617952 | -1.077255 |
| 13               | 6                | 0              | -2.777526               | -2.492901 | -0.555420 |
| 14               | 6                | 0              | -2.079473               | -1.285430 | -0.299101 |

|    |   |   |           |           |           |
|----|---|---|-----------|-----------|-----------|
| 15 | 6 | 0 | -2.758958 | -0.145566 | 0.271645  |
| 16 | 6 | 0 | -4.152309 | -0.249330 | 0.436170  |
| 17 | 1 | 0 | -4.706973 | 0.619160  | 0.754282  |
| 18 | 6 | 0 | -4.869607 | -1.429781 | 0.149974  |
| 19 | 6 | 0 | -4.168777 | -2.544573 | -0.309266 |
| 20 | 1 | 0 | -4.696149 | -3.465357 | -0.509526 |
| 21 | 6 | 0 | -6.400410 | -1.444812 | 0.355052  |
| 22 | 6 | 0 | -6.727019 | -1.146597 | 1.837502  |
| 23 | 1 | 0 | -7.811094 | -1.169231 | 1.994257  |
| 24 | 1 | 0 | -6.368090 | -0.161587 | 2.148307  |
| 25 | 1 | 0 | -6.275887 | -1.895181 | 2.497988  |
| 26 | 6 | 0 | -7.032626 | -2.801563 | -0.006737 |
| 27 | 1 | 0 | -6.869895 | -3.065111 | -1.056805 |
| 28 | 1 | 0 | -8.113979 | -2.750581 | 0.155288  |
| 29 | 1 | 0 | -6.646441 | -3.615482 | 0.615318  |
| 30 | 6 | 0 | -7.050342 | -0.362900 | -0.540042 |
| 31 | 1 | 0 | -6.838594 | -0.549126 | -1.598630 |
| 32 | 1 | 0 | -6.696627 | 0.642851  | -0.296414 |
| 33 | 1 | 0 | -8.137838 | -0.372138 | -0.407679 |
| 34 | 6 | 0 | 0.771121  | 3.826815  | 0.234602  |
| 35 | 1 | 0 | 1.656600  | 3.564200  | -0.334983 |
| 36 | 6 | 0 | 0.641542  | 5.111305  | 0.798311  |
| 37 | 1 | 0 | 1.424943  | 5.846396  | 0.643284  |
| 38 | 6 | 0 | -0.475548 | 5.394290  | 1.555069  |
| 39 | 1 | 0 | -0.600732 | 6.366566  | 2.024753  |
| 40 | 6 | 0 | -1.472778 | 4.402427  | 1.740447  |
| 41 | 6 | 0 | -1.279729 | 3.144671  | 1.090783  |
| 42 | 6 | 0 | -2.263909 | 2.080384  | 1.203334  |
| 43 | 6 | 0 | -3.344269 | 2.320761  | 2.075262  |
| 44 | 1 | 0 | -4.055075 | 1.538490  | 2.296865  |
| 45 | 6 | 0 | -3.510458 | 3.558359  | 2.724547  |
| 46 | 1 | 0 | -4.368311 | 3.684627  | 3.380608  |
| 47 | 6 | 0 | -2.620767 | 4.602932  | 2.550764  |
| 48 | 1 | 0 | -2.770362 | 5.560968  | 3.039941  |
| 49 | 6 | 0 | 0.658210  | 0.085775  | 2.652307  |
| 50 | 1 | 0 | -0.367698 | 0.354685  | 2.888543  |
| 51 | 6 | 0 | 1.495790  | -0.438893 | 3.681403  |
| 52 | 6 | 0 | 1.012275  | -0.574571 | 5.005497  |
| 53 | 1 | 0 | -0.006512 | -0.268558 | 5.228407  |
| 54 | 6 | 0 | 1.831070  | -1.087360 | 5.993983  |
| 55 | 1 | 0 | 1.465486  | -1.191437 | 7.011634  |
| 56 | 6 | 0 | 3.149291  | -1.476170 | 5.674362  |
| 57 | 1 | 0 | 3.793871  | -1.877082 | 6.452178  |
| 58 | 6 | 0 | 3.638175  | -1.354501 | 4.382641  |
| 59 | 1 | 0 | 4.657570  | -1.661774 | 4.179486  |
| 60 | 6 | 0 | 2.824411  | -0.832356 | 3.349170  |
| 61 | 6 | 0 | 3.250629  | -0.669123 | 1.969316  |
| 62 | 6 | 0 | 2.336737  | -0.083906 | 1.060895  |
| 63 | 6 | 0 | 2.722124  | 0.154386  | -0.309299 |
| 64 | 6 | 0 | 3.967075  | -0.339687 | -0.735893 |
| 65 | 1 | 0 | 4.220434  | -0.275433 | -1.783673 |
| 66 | 6 | 0 | 4.872747  | -0.965113 | 0.144704  |
| 67 | 6 | 0 | 4.513956  | -1.089413 | 1.487614  |
| 68 | 1 | 0 | 5.201905  | -1.549701 | 2.181444  |
| 69 | 6 | 0 | 6.214661  | -1.494469 | -0.404886 |
| 70 | 6 | 0 | 5.936666  | -2.564750 | -1.487153 |
| 71 | 1 | 0 | 5.371409  | -3.406266 | -1.072137 |

|     |    |   |           |           |           |
|-----|----|---|-----------|-----------|-----------|
| 72  | 1  | 0 | 6.883048  | -2.954434 | -1.877580 |
| 73  | 1  | 0 | 5.371865  | -2.161163 | -2.332360 |
| 74  | 6  | 0 | 7.087735  | -2.138047 | 0.688012  |
| 75  | 1  | 0 | 7.351234  | -1.426459 | 1.477234  |
| 76  | 1  | 0 | 8.021801  | -2.491780 | 0.240469  |
| 77  | 1  | 0 | 6.599218  | -3.001051 | 1.151744  |
| 78  | 6  | 0 | 7.014273  | -0.327303 | -1.030264 |
| 79  | 1  | 0 | 6.483875  | 0.134377  | -1.867647 |
| 80  | 1  | 0 | 7.974898  | -0.693378 | -1.408504 |
| 81  | 1  | 0 | 7.219322  | 0.451589  | -0.287818 |
| 82  | 6  | 0 | -1.636263 | 1.707085  | -2.895668 |
| 83  | 1  | 0 | -2.533554 | 1.511309  | -2.316681 |
| 84  | 6  | 0 | -1.728020 | 2.219635  | -4.204823 |
| 85  | 1  | 0 | -2.704735 | 2.402642  | -4.641244 |
| 86  | 6  | 0 | -0.565953 | 2.494862  | -4.894696 |
| 87  | 1  | 0 | -0.595844 | 2.909974  | -5.898620 |
| 88  | 6  | 0 | 0.688868  | 2.246194  | -4.282594 |
| 89  | 6  | 0 | 0.681599  | 1.685387  | -2.972037 |
| 90  | 6  | 0 | 1.925500  | 1.366717  | -2.293763 |
| 91  | 6  | 0 | 3.118948  | 1.761440  | -2.927578 |
| 92  | 1  | 0 | 4.067519  | 1.658189  | -2.418630 |
| 93  | 6  | 0 | 3.109596  | 2.341180  | -4.208576 |
| 94  | 1  | 0 | 4.057893  | 2.624886  | -4.657230 |
| 95  | 6  | 0 | 1.930321  | 2.558371  | -4.899691 |
| 96  | 1  | 0 | 1.935348  | 2.993616  | -5.894726 |
| 97  | 7  | 0 | -0.748076 | -1.124772 | -0.609004 |
| 98  | 7  | 0 | -1.961780 | 0.946289  | 0.505395  |
| 99  | 7  | 0 | -0.154580 | 2.885060  | 0.369575  |
| 100 | 7  | 0 | 1.054037  | 0.262947  | 1.415866  |
| 101 | 7  | 0 | 1.769984  | 0.779985  | -1.071563 |
| 102 | 7  | 0 | -0.477876 | 1.445902  | -2.303129 |
| 103 | 28 | 0 | -0.093226 | 0.862983  | -0.280212 |
